# Supplementary material for: Variable level of genetic dominance controls important agronomic traits in rice populations under water deficit condition
Source: PeerJ. 2023 Feb 13;11:e14833. doi: 10.7717/peerj.14833 (PMC9933770; doi:10.7717/peerj.14833)
Supplement: Supplemental Information 1 [file peerj-11-14833-s001.xlsx]

## Sheet: Table S1
Table S1: List of rice type of tolerant and susceptible genotypes, source and origin.
Genotype		parentage	DR	Source	Origin
1	Giza 178	Giza 175 / Milyang 49	T	RRTC	Egypt
2	Sakha 106	Giza 177 / Hexi 30	S	RRTC	Egypt
3	Sakha 104	GZ4096-8-1 x GZ 4100-9-1	MT	RRTC	Egypt
4	WAB56-104	WAB56-104	T	Africa Rice Center	West Africa Rice Development Association (WARDA)
T = Tolerant, MT = Moderately Tolerant, S = Susceptible, RRTC = Rice Research & Training Center, Warda = Bangladesh Rice Research Institute.

## Sheet: Table S2
Table S2: Means and standard error of the six populations for rice root characters in the two studied crosses under water deficit (D) and normal (N) conditions.
Characters	Cross		Mean performance and standard error
			P1	P2	F1	BCI	BC2	F2
Root length (cm)	I	D	21.13±0.10	18.96±0.08	29.41±0.06	22.33±0.06	21.55±0.06	21.57±0.19
		N	26.92±0.05	24.23±0.06	34.96±0.06	31.47±0.06	29.31±0.06	27.33±0.14
	II	D	21.23±0.09	25.81±0.10	28.43±0.11	22.22±0.06	25.90±0.06	22.23±0.26
		N	26.03±0.06	29.83±0.05	38.35±0.05	29.90±0.06	34.37±0.06	27.58±0.18
Root volume (cm3)	I	D	51.56±0.38	21.56±0.10	100.08±0.26	50.71±0.24	48.43±0.36	45.13±1.21
		N	80.27±0.16	35.35±0.13	117.96±0.16	84.76±0.18	56.42±0.22	70.50±0.65
	II	D	23.53±0.18	60.42±0.27	106.28±0.36	36.18±0.28	65.50±0.18	49.39±0.74
		N	53.87±0.09	80.87±0.07	119.96±0.15	84.51±0.16	94.98±0.06	68.67±0.55
Number of roots/plant	I	D	115.58±0.53	110.60±0.14	252.55±0.60	154.91±0.60	118.50±0.68	173.25±1.51
		N	232.88±0.19	160.05±0.40	313.86±0.32	240.78±0.11	230.87±0.19	231.09±1.21
	II	D	141.30±0.59	150.25±0.87	136.00±0.12	150.36±0.61	162.78±0.67	174.41±1.05
		N	174.13±0.31	242.70±0.23	353.28±0.33	244.17±0.30	267.45±0.32	244.17±1.32
Root/Shoot ratio (%)	I	D	2.29±0.01	0.99±0.01	11.12±0.06	6.09±0.05	3.12±0.01	0.37±0.01
		N	1.17±0.006	0.35±0.005	1.50±0.008	0.91±0.005	0.64±0.005	0.83±0.011
	II	D	2.68±0.024	2.35±0.037	2.86±0.017	2.74±0.015	2.59±0.016	2.70±0.013
		N	0.44±0.006	0.78±0.009	0.94±0.007	0.53±0.005	0.71±0.006	0.71±0.012
Means and standard error of the six populations for rice root characters in two studied crosses (CI: Giza 178 x Sakha 106 and CII: Sakha 104 x WAB56-104) under water deficit (D) and normal (N) conditions.
P1 & P2 = female parent (Giza 178 and Sakha 104),
P3 & P4= Male parent (Sakha 106 and WAB56-104)
F1 = CI:P1 x P2 (Giza 178 x Sakha 106), CII: P3 x P4 = (Sakha 104 x WAB56-104)
F2 = Selfed seeds from F1
BC1 = F1 backcrossed to female parent
BC2 = F2 backcrossed to male parent

## Sheet: Table S3
Table S3: Means and standard errors of the six populations of agronomic, yield and its components characters for the two studied crosses under water deficit (D) and normal (N) conditions.
Characters			P1	P2	F1	BC1	BC2	F2
Duration (day)	I	D	134.02±0.14	123.53±0.17	127.53±0.23	125.91±0.29	123.96±0.28	126.12±0.61
		N	132.21±0.23	120.03±0.25	144.90±0.57	131.95±0.13	122.58±0.06	123.99±1.51
	II	D	137.00±0.15	136.23±0.24	139.97±0.21	133.38±0.22	129.76±0.29	132.13±0.59
		N	136.44±0.07	128.21±0.07	133.18±0.09	133.61±0.20	127.54±0.09	126.69±0.23
Plant height (cm)	I	D	76.67±0.18	74.60±0.12	81.13±0.16	75.21±0.27	71.51±0.23	77.80±0.58
		N	95.58±0.15	101.03±0.11	116.73±0.15	120.46±0.12	117.33±0.17	122.23±0.52
	II	D	86.97±0.21	78.36±0.22	75.97±0.45	81.25±0.27	76.00±0.26	83.08±0.89
		N	104.88±0.09	102.51±0.14	130.86±0.16	120.18±0.22	122.81±0.15	120.75±0.49
Panicle length (cm)	I	D	21.67±0.06	18.56±0.06	23.23±0.05	22.87±0.06	21.03±0.09	22.80±0.17
		N	21.25±0.05	23.11±0.06	24.76±0.07	23.76±0.05	23.13±0.05	22.93±0.14
	II	D	19.10±0.05	21.32±0.06	21.12±0.06	20.90±0.02	21.80±0.03	20.92±0.16
		N	21.13±0.05	23.28±0.06	25.95±0.06	23.00±0.05	24.50±0.06	24.13±0.16
No. of panicles/plant	I	D	15.07±0.17	8.38±0.11	18.10±0.15	13.80±0.14	10.75±0.18	13.39±0.39
		N	20.23±0.10	13.93±0.11	22.03±0.09	19.20±0.06	17.08±0.06	18.08±0.28
	II	D	11.38±0.14	16.08±0.13	19.11±0.17	14.15±0.11	16.61±0.10	16.09±0.38
		N	17.17±0.10	20.28±0.08	22.77±0.08	18.33±0.06	20.47±0.07	19.15±0.27
No. of filled grains/panicle	I	D	130.55±0.62	90.82±0.29	101.88±0.46	75.66±0.26	108.26±0.27	65.57±1.21
		N	144.72±0.24	115.43±0.18	101.06±0.20	134.55±0.21	92.96±0.15	100.68±0.42
	II	D	105.48±0.33	121.81±0.28	127.46±0.47	102.52±0.27	117.98±0.35	107.75±0.83
		N	119.26±0.18	169.35±0.14	179.43±0.17	129.41±0.14	170.66±0.17	141.71±0.69
1000-grain weight (g)	I	D	18.79±0.06	25.57±0.06	25.88±0.07	21.36±0.06	22.95±0.10	21.78±0.19
		N	21.09±0.06	30.34±0.06	27.25±0.05	22.70±0.06	26.27±0.06	25.65±0.18
	II	D	26.90±0.06	18.43±0.05	22.98±0.06	21.48±0.06	19.75±0.05	21.90±0.19
		N	30.00±0.06	22.38±0.05	26.15±0.06	25.15±0.05	23.97±0.5	25.65±0.18
Sterility %	I	D	6.46±0.09	13.23±0.12	47.71±0.25	32.62±0.25	36.36±0.25	41.65±0.56
		N	3.06±0.06	7.32±0.07	37.98±0.21	7.85±0.06	21.10±0.07	28.60±0.41
	II	D	15.01±0.09	17.54±0.19	35.58±0.17	24.06±0.19	26.77±0.16	17.70±0.39
		N	4.57±0.05	6.77±0.08	21.91±0.08	13.20±0.06	5.77±0.06	11.14±0.21
Grain yield/plant (g)	I	D	28.71±0.06	20.70±0.06	31.56±0.06	28.95±0.07	24.90±0.06	25.32±0.19
		N	41.47±0.06	35.03±0.06	46.96±0.06	42.11±0.09	37.57±0.06	36.95±0.44
	II	D	27.08±0.05	33.35±0.08	36.76±0.06	29.80±0.06	34.15±0.08	29.86±0.26
		N	38.97±0.07	45.50±0.07	46.76±0.08	39.95±0.06	41.03±0.15	39.85±0.18
Means and standard errors of the six populations of agronomic, yield and its components characters for the two studied crosses (CI: Giza 178 x Sakha 106, CII: Sakha 104 x WAB56-104) under water deficit (D) and normal (N) conditions.
P1 & P2 = female parent (Giza 178 and Sakha 104),
P3 & P4= Male parent (Sakha 106 and WAB56-104)
F1 = CI:P1 x P2 (Giza 178 x Sakha 106), CII: P3 x P4 = (Sakha 104 x WAB56-104)
F2 = Selfed seeds from F1
BC1 = F1 backcrossed to female parent
BC2 = F2 backcrossed to male parent

## Sheet: Table S4
Table S4: Mean performance of the six populations for rice root, yield and its components characters in the two studied ‎crosses under normal (N) conditions.‎
				Duration
				Cross:1
				P1
	Plants	R1	R2	R3	R4	Total
	1	130	132	129	130	521
	2	130	134	132	127	523
	3	133	131	133	129	526
	4	131	130	131	132	524
	5	132	132	134	135	533
	6	133	133	135	134	535
	7	131	134	132	133	530
	8	135	130	133	131	529
	9	136	136	131	130	533
	10	131	132	130	135	528
	11	130	133	130	136	529
	12	130	131	130	129	520
	13	133	130	128	128	519
	14	132	135	131	135	533
	15	133	132	129	136	530
	16	131	136	135	134	536
	17	132	131	136	132	531
	18	131	133	132	132	528
	19	135	132	133	133	533
	20	136	130	134	136	536
	Total	2645	2647	2638	2647	10577
	Means	132.25	132.35	131.9	132.35	132.213
			P2
	Plants	R1	R2	R3	R4	Total
	1	121	120	121	119	481
	2	123	122	122	120	487
	3	123	123	120	120	486
	4	121	117	117	117	472
	5	120	118	117	119	474
	6	117	120	118	120	475
	7	118	119	119	121	477
	8	118	121	120	121	480
	9	117	123	121	122	483
	10	121	122	123	119	485
	11	123	124	122	117	486
	12	120	116	124	118	478
	13	117	117	119	120	473
	14	124	120	117	119	480
	15	121	120	116	123	480
	16	117	119	120	123	479
	17	118	121	121	124	484
	18	118	123	120	122	483
	19	117	123	120	120	480
	20	121	122	121	116	480
	Total	2395	2410	2398	2400	9603
	Means	119.75	120.5	119.9	120	120.037
			F1
	Plants	R1	R2	R3	R4	Total
	1	144	143	148	140	575
	2	143	146	144	150	583
	3	150	142	143	151	586
	4	150	143	141	154	588
	5	143	150	140	140	573
	6	144	146	149	141	580
	7	144	150	150	143	587
	8	143	153	140	144	580
	9	151	146	139	142	578
	10	152	137	143	147	579
	11	152	143	146	144	585
	12	153	153	151	139	596
	13	143	141	152	150	586
	14	142	142	149	143	576
	15	143	144	148	139	574
	16	142	149	138	143	572
	17	143	154	143	140	580
	18	143	139	153	143	578
	19	141	134	139	153	567
	20	143	143	144	139	569
	Total	2909	2898	2900	2885	11592
	Means	145.45	144.9	145	144.25	144.9
			F2
	Plants	R1	R2	R3	R4	Total
	1	125	118	151	137	531
	2	129	127	109	144	509
	3	112	119	116	151	498
	4	117	105	118	118	458
	5	125	144	98	149	516
	6	147	143	112	118	520
	7	109	127	117	127	480
	8	115	119	125	119	478
	9	106	118	147	105	476
	10	121	107	109	144	481
	11	144	104	115	143	506
	12	174	135	138	127	574
	13	119	109	118	119	465
	14	105	137	127	118	487
	15	144	144	119	107	514
	16	143	151	105	118	517
	17	127	109	144	107	487
	18	119	116	143	104	482
	19	118	118	127	135	498
	20	107	98	119	109	433
	21	104	112	118	137	471
	22	135	117	139	144	535
	23	109	125	104	151	489
	24	137	147	135	109	528
	25	144	109	109	116	478
	26	151	115	147	118	531
	27	109	106	109	98	422
	28	116	121	115	112	464
	29	118	144	147	117	526
	30	98	174	121	132	525
	31	147	143	112	118	520
	32	109	127	117	127	480
	33	115	119	125	119	478
	34	106	118	147	105	476
	35	121	107	109	144	481
	36	144	104	115	143	506
	37	174	135	138	127	574
	38	119	109	118	119	465
	39	105	137	127	118	487
	40	144	144	119	107	514
	41	143	151	105	118	517
	42	127	109	144	107	487
	43	119	116	143	104	482
	44	118	118	127	135	498
	45	107	98	119	109	433
	46	104	112	118	137	471
	47	135	117	139	144	535
	48	109	125	104	151	489
	49	137	147	135	109	528
	50	144	109	109	116	478
	Total	6254	6163	6171	6190	24778
	Means	125.08	123.26	123.42	123.8	123.89
			BC1
	Plants	R1	R2	R3	R4	Total
	1	138	137	137	137	549
	2	133	134	133	134	534
	3	126	125	125	126	502
	4	128	129	129	128	514
	5	122	125	123	124	494
	6	133	134	133	134	534
	7	134	135	134	135	538
	8	141	140	140	141	562
	9	136	135	136	135	542
	10	137	138	137	137	549
	11	138	137	138	138	551
	12	134	125	125	124	508
	13	127	126	126	127	506
	14	133	134	134	133	534
	15	137	136	137	136	546
	16	131	132	131	132	526
	17	122	121	121	122	486
	18	129	130	130	129	518
	19	138	137	138	137	550
	20	128	128	129	128	513
	Total	2645	2638	2636	2637	10556
	Means	132.25	131.9	131.8	131.85	131.95
			BC2
	Plants	R1	R2	R3	R4	Total
	1	121	122	122	121	486
	2	121	120	121	120	482
	3	121	120	121	120	482
	4	125	124	125	124	498
	5	131	130	130	131	522
	6	115	116	116	115	462
	7	116	116	115	115	462
	8	117	118	118	117	470
	9	118	119	118	119	474
	10	119	118	118	119	474
	11	120	121	120	121	482
	12	121	122	122	121	486
	13	122	123	122	122	489
	14	123	124	122	123	492
	15	124	123	124	123	494
	16	130	130	129	129	518
	17	126	124	125	125	500
	18	127	128	127	128	510
	19	128	128	127	127	510
	20	129	129	128	128	514
	Total	2454	2455	2450	2448	9807
	Means	122.7	122.75	122.5	122.4	122.588
			Duration
			Cross:2
			P1
	Plants	R1	R2	R3	R4	Total
	1	138	137	138	136	549
	2	138	139	138	139	554
	3	134	133	134	135	536
	4	136	135	135	135	541
	5	138	139	137	139	553
	6	135	136	136	136	543
	7	137	136	136	136	545
	8	137	136	137	137	547
	9	136	136	136	136	544
	10	139	138	139	138	554
	11	135	136	135	134	540
	12	134	134	134	134	536
	13	138	139	138	139	554
	14	137	135	137	136	545
	15	136	135	136	135	542
	16	135	136	135	135	541
	17	139	138	139	138	554
	18	136	137	136	137	546
	19	135	136	135	135	541
	20	138	138	138	136	550
	Total	2731	2729	2729	2726	10915
	Means	136.55	136.45	136.45	136.3	136.438
			P2
	Plants	R1	R2	R3	R4	Total
	1	128	129	129	128	514
	2	128	127	127	126	508
	3	129	130	129	130	518
	4	126	125	126	125	502
	5	127	128	127	128	510
	6	129	130	129	130	518
	7	132	131	133	132	528
	8	131	130	131	130	522
	9	130	129	130	129	518
	10	127	128	127	128	510
	11	128	128	129	129	514
	12	129	129	128	128	514
	13	127	126	127	126	506
	14	125	124	126	125	500
	15	124	123	125	123	495
	16	130	131	130	131	522
	17	131	130	131	130	522
	18	128	129	128	129	514
	19	127	128	127	128	510
	20	128	127	129	128	512
	Total	2564	2562	2568	2563	10257
	Means	128.2	128.1	128.4	128.15	128.212
			F1
	Plants	R1	R2	R3	R4	Total
	1	134	133	134	133	534
	2	131	130	132	131	524
	3	135	134	135	136	540
	4	134	135	134	133	536
	5	133	134	133	134	534
	6	132	131	131	132	526
	7	131	132	132	131	526
	8	135	135	135	134	539
	9	134	135	136	136	541
	10	133	132	134	132	531
	11	132	133	132	131	528
	12	135	135	134	134	538
	13	134	133	134	133	534
	14	133	132	133	132	530
	15	134	134	132	133	533
	16	132	131	133	132	528
	17	131	130	131	132	524
	18	135	134	133	135	537
	19	134	135	134	135	538
	20	133	134	132	134	533
	Total	2665	2662	2664	2663	10654
	Means	133.25	133.1	133.2	133.15	133.175
			F2
	Plants	R1	R2	R3	R4	Total
	1	135	134	127	126	522
	2	132	128	128	131	519
	3	126	127	129	130	512
	4	116	120	122	118	476
	5	117	121	122	117	477
	6	118	123	124	118	483
	7	119	121	122	119	481
	8	120	127	126	120	493
	9	129	131	120	121	501
	10	122	120	121	121	484
	11	123	124	130	132	509
	12	124	123	131	126	504
	13	125	123	124	128	500
	14	126	129	132	127	514
	15	130	128	126	131	515
	16	132	129	127	127	515
	17	129	128	128	128	513
	18	130	130	129	130	519
	19	131	131	132	132	526
	20	132	131	131	130	524
	21	133	134	133	132	532
	22	134	135	134	133	536
	23	124	125	124	125	498
	24	123	125	124	124	496
	25	126	121	121	126	494
	26	136	131	135	131	533
	27	138	133	135	131	537
	28	121	122	121	123	487
	29	125	121	125	121	492
	30	128	129	128	126	511
	31	118	123	124	118	483
	32	119	121	122	119	481
	33	120	127	126	120	493
	34	129	131	120	121	501
	35	122	120	121	121	484
	36	123	124	130	132	509
	37	124	123	131	126	504
	38	125	123	124	128	500
	39	126	129	132	127	514
	40	130	128	126	131	515
	41	132	129	127	127	515
	42	129	128	128	128	513
	43	130	130	129	130	519
	44	131	131	132	132	526
	45	132	131	131	130	524
	46	133	134	133	132	532
	47	134	135	134	133	536
	48	124	125	124	125	498
	49	123	125	124	124	496
	50	126	121	121	126	494
	Total	6334	6342	6350	6314	25340
	Means	126.68	126.84	127	126.28	126.7
			BC1
	Plants	R1	R2	R3	R4	Total
	1	132	132.3	132.4	132	528.7
	2	135.3	135	135.7	135.2	541.2
	3	136.2	136.7	136	136.5	545.4
	4	138	138.9	138.5	138.3	553.7
	5	128.6	128	128.7	128.5	513.8
	6	139	140	139	140	558
	7	136	136	136	135	543
	8	135	134.6	135	134	538.6
	9	131	131.7	132	132	526.7
	10	131.5	131	132	132	526.5
	11	130.8	130	130	131	521.8
	12	131	129	131	130	521
	13	130	130.8	130	131	521.8
	14	129	129.8	129	130	517.8
	15	135.5	135.7	134.9	134.5	540.6
	16	138	137	136	137.5	548.5
	17	134	132	133	132.7	531.7
	18	135	137	136	135	543
	19	135	134	136	133	538
	20	130	132	131	131.4	524.4
	Total	2670.9	2671.5	2672.2	2669.6	10684.2
	Means	133.545	133.575	133.61	133.48	133.553
			BC2
	Plants	R1	R2	R3	R4	Total
	1	120	122	121	120	483
	2	123	122	123	122	490
	3	133	132	133	131	529
	4	124	126	126	125	501
	5	126	127	126	127	506
	6	133	133	132	133	531
	7	135	136	136	135	542
	8	121	120	121	120	482
	9	122	121	121	122	486
	10	133	132	133	132	530
	11	132	133	132	133	530
	12	121	121	120	120	482
	13	133	134	133	134	534
	14	133	134	133	134	534
	15	123	124	125	124	496
	16	126	127	126	127	506
	17	129	128	129	128	514
	18	128	129	129	128	514
	19	130	131	130	131	522
	20	124	120	124	123	491
	Total	2549	2552	2553	2549	10203
	Means	127.45	127.6	127.65	127.45	127.538
			plant height
			Cross I
			P1
	Plants	R1	R2	R3	R4	Total
	1	98	100	99	97	394
	2	95	96	97	98	386
	3	96	99	95	97	387
	4	96	94	97	95	382
	5	96	94	92	95	377
	6	90	95	93	92	370
	7	94	93	96	95	378
	8	93	96	92	94	375
	9	97	96	95	95	383
	10	93	94	95	94	376
	11	96	95	93	94	378
	12	96	95	97	96	384
	13	97	96	96	97	386
	14	95	96	97	96	384
	15	95	94	93	94	376
	16	98	96	99	97	390
	17	98	97	94	96	385
	18	96	95	97	98	386
	19	98	96	95	97	386
	20	95	94	98	97	384
	Total	1912	1911	1910	1914	7647
	Means	95.6	95.55	95.5	95.7	95.5875
			P2
	Plants	R1	R2	R3	R4	Total
	1	100	101	100	102	403
	2	107	105	107	106	425
	3	99	98	99	100	396
	4	102	103	102	101	408
	5	107	106	105	106	424
	6	102	97	98	100	397
	7	100	98	99	99	396
	8	97	99	98	99	393
	9	102	103	104	103	412
	10	101	99	99	100	399
	11	98	97	99	99	393
	12	99	101	100	101	401
	13	97	98	99	98	392
	14	98	100	99	99	396
	15	100	101	102	101	404
	16	102	104	103	103	412
	17	103	101	102	102	408
	18	106	104	105	105	420
	19	102	104	103	103	412
	20	99	97	98	98	392
	Total	2021	2016	2021	2025	8083
	Means	101.05	100.8	101.05	101.25	101.037
			F1
	Plants	R1	R2	R3	R4	Total
	1	128	126	127	125	506
	2	125	127	126	128	506
	3	116	113	115	114	458
	4	120	121	119	123	483
	5	118	115	119	117	469
	6	113	116	115	114	458
	7	125	125	124	126	500
	8	112	114	110	115	451
	9	122	120	118	120	480
	10	115	114	116	117	462
	11	126	124	125	126	501
	12	110	111	112	109	442
	13	110	109	109	108	436
	14	119	117	115	116	467
	15	113	114	112	110	449
	16	115	116	117	116	464
	17	110	110	110	111	441
	18	114	114	111	112	451
	19	113	111	111	112	447
	20	116	118	118	116	468
	Total	2340	2335	2329	2335	9339
	Means	117	116.75	116.45	116.75	116.737
			F2
	Plants	R1	R2	R3	R4	Total
	1	131	125	120	132	508
	2	125	122	123	124	494
	3	129	142	141	130	542
	4	145	148	123	118	534
	5	116	100	104	115	435
	6	130	115	120	131	496
	7	126	124	115	120	485
	8	131	126	120	133	510
	9	120	120	121	124	485
	10	134	131	128	136	529
	11	120	118	115	121	474
	12	120	122	130	134	506
	13	120	119	126	126	491
	14	116	129	129	120	494
	15	123	125	130	135	513
	16	119	129	127	118	493
	17	105	127	114	110	456
	18	121	122	136	130	509
	19	119	130	126	120	495
	20	122	116	118	123	479
	21	109	108	113	113	443
	22	110	112	116	110	448
	23	114	111	110	110	445
	24	121	124	119	117	481
	25	117	118	121	122	478
	26	109	114	116	110	449
	27	132	130	130	123	515
	28	143	140	135	134	552
	29	112	106	110	110	438
	30	120	126	127	117	490
	31	126	124	115	120	485
	32	131	126	120	133	510
	33	120	120	121	124	485
	34	134	131	128	136	529
	35	120	118	115	121	474
	36	120	122	130	134	506
	37	120	119	126	126	491
	38	116	129	129	120	494
	39	123	125	130	135	513
	40	119	129	127	118	493
	41	105	127	114	110	456
	42	121	122	136	130	509
	43	119	130	126	120	495
	44	122	116	118	123	479
	45	109	108	113	113	443
	46	110	112	116	110	448
	47	114	111	110	110	445
	48	121	124	119	117	481
	49	117	118	121	122	478
	50	109	114	116	110	449
	Total	6035	6104	6093	6098	24330
	Means	120.7	122.08	121.86	121.96	121.65
			BC1
	Plants	R1	R2	R3	R4	Total
	1	120	120	122	121	483
	2	140	142	143	141	566
	3	130	132	131	131	524
	4	120	120	118	119	477
	5	143	140	141	142	566
	6	128	130	127	129	514
	7	113	114	116	115	458
	8	124	126	123	125	498
	9	105	105	107	106	423
	10	115	114	117	116	462
	11	123	122	120	121	486
	12	118	121	120	119	478
	13	106	108	105	107	426
	14	115	116	114	115	460
	15	122	123	121	121	487
	16	117	115	115	116	463
	17	109	108	110	109	436
	18	115	114	116	115	460
	19	119	118	120	119	476
	20	125	123	124	122	494
	Total	2407	2411	2410	2409	9637
	Means	120.35	120.55	120.5	120.45	120.462
			BC2
	Plants	R1	R2	R3	R4	Total
	1	115	117	113	116	461
	2	125	127	130	128	510
	3	125	125	129	127	506
	4	116	119	116	118	469
	5	111	114	112	113	450
	6	133	130	130	131	524
	7	120	124	125	123	492
	8	122	126	124	123	495
	9	113	112	115	113	453
	10	115	113	111	112	451
	11	115	112	114	116	457
	12	118	114	116	114	462
	13	124	122	120	122	488
	14	119	117	118	120	474
	15	110	109	111	111	441
	16	113	112	110	111	446
	17	113	116	115	114	458
	18	112	110	112	111	445
	19	114	113	115	113	455
	20	112	110	113	114	449
	Total	2345	2342	2349	2350	9386
	Means	117.25	117.1	117.45	117.5	117.325
			Plant height
			Cross II
			P1
	Plants	R1	R2	R3	R4	Total
	1	105	107	106	106	424
	2	108	106	107	107	428
	3	104	106	105	105	420
	4	103	102	104	103	412
	5	106	108	107	106	427
	6	106	106	107	107	426
	7	106	107	107	106	426
	8	105	104	104	105	418
	9	107	105	106	106	424
	10	109	107	106	108	430
	11	102	102	103	104	411
	12	104	102	103	104	413
	13	106	108	107	106	427
	14	108	109	106	107	430
	15	107	107	106	106	426
	16	106	107	106	107	426
	17	106	105	105	106	422
	18	105	104	104	103	416
	19	109	108	107	107	431
	20	108	109	109	108	434
	Total	2120	2119	2115	2117	8471
	Means	106	105.95	105.75	105.85	105.887
			P2
	Plants	R1	R2	R3	R4	Total
	1	104	107	106	108	425
	2	105	106	107	109	427
	3	113	116	114	115	458
	4	104	102	105	103	414
	5	104	104	106	105	419
	6	94	96	93	95	378
	7	104	107	106	105	422
	8	105	104	107	106	422
	9	103	106	102	104	415
	10	106	104	103	102	415
	11	102	104	103	105	414
	12	107	109	109	108	433
	13	101	103	102	100	406
	14	102	100	99	101	402
	15	106	109	107	108	430
	16	104	101	102	103	410
	17	109	107	106	108	430
	18	99	102	100	101	402
	19	105	107	108	106	426
	20	104	102	103	104	413
	Total	2081	2096	2088	2096	8361
	Means	104.05	104.8	104.4	104.8	104.513
			F1
	Plants	R1	R2	R3	R4	Total
	1	139	136	138	137	550
	2	136	139	136	138	549
	3	138	141	142	140	561
	4	144	140	141	142	567
	5	148	147	144	146	585
	6	133	135	136	134	538
	7	139	137	138	140	554
	8	129	132	128	130	519
	9	129	123	128	126	506
	10	127	122	126	125	500
	11	136	137	136	138	547
	12	128	129	131	130	518
	13	132	131	134	133	530
	14	127	126	128	129	510
	15	129	130	131	132	522
	16	126	125	126	125	502
	17	133	136	135	134	538
	18	124	126	126	125	501
	19	129	130	128	129	516
	20	129	130	128	129	516
	Total	2655	2652	2660	2662	10629
	Means	132.75	132.6	133	133.1	132.863
			F2
	Plants	R1	R2	R3	R4	Total
	1	140	128	132	138	538
	2	124	118	120	125	487
	3	130	139	118	132	519
	4	128	135	134	140	537
	5	128	122	118	127	495
	6	127	112	117	124	480
	7	130	128	136	135	529
	8	124	136	134	128	522
	9	132	144	145	135	556
	10	127	114	129	130	500
	11	116	125	124	112	477
	12	125	135	134	128	522
	13	116	112	108	117	453
	14	130	129	119	136	514
	15	136	136	115	136	523
	16	118	122	130	128	498
	17	138	140	132	132	542
	18	122	127	128	122	499
	19	109	110	115	114	448
	20	125	122	120	130	497
	21	120	129	125	120	494
	22	127	129	128	122	506
	23	114	116	115	117	462
	24	121	117	118	118	474
	25	119	112	118	109	458
	26	116	117	117	116	466
	27	127	125	122	117	491
	28	132	119	125	132	508
	29	130	132	134	119	515
	30	117	116	117	110	460
	31	127	112	117	124	480
	32	130	128	136	135	529
	33	124	136	134	128	522
	34	132	144	145	135	556
	35	127	114	129	130	500
	36	116	125	124	112	477
	37	125	135	134	128	522
	38	116	112	108	117	453
	39	130	129	119	136	514
	40	136	136	115	136	523
	41	118	122	130	128	498
	42	138	140	132	132	542
	43	122	127	128	122	499
	44	109	110	115	114	448
	45	125	122	120	130	497
	46	120	129	125	120	494
	47	127	129	128	122	506
	48	114	116	115	117	462
	49	121	117	118	118	474
	50	119	112	118	109	458
	Total	6224	6241	6217	6242	24924
	Means	124.48	124.82	124.34	124.84	124.62
			BC1
	Plants	R1	R2	R3	R4	Total
	1	119	121	118	120	478
	2	106	105	105	107	423
	3	113	111	110	112	446
	4	115	117	116	114	462
	5	118	120	119	117	474
	6	117	117	116	119	469
	7	125	127	126	127	505
	8	111	113	112	114	450
	9	133	135	132	121	521
	10	138	137	138	136	549
	11	138	131	132	134	535
	12	123	121	122	125	491
	13	124	122	124	126	496
	14	118	120	119	121	478
	15	121	123	121	122	487
	16	121	119	120	118	478
	17	123	124	125	124	496
	18	120	119	121	119	479
	19	123	125	126	124	498
	20	119	121	121	119	480
	Total	2425	2428	2423	2419	9695
	Means	121.25	121.4	121.15	120.95	121.188
			BC2
	Plants	R1	R2	R3	R4	Total
	1	121	120	123	122	486
	2	125	123	123	124	495
	3	135	132	130	133	530
	4	122	123	122	123	490
	5	133	133	132	134	532
	6	121	124	122	123	490
	7	122	126	125	123	496
	8	124	122	123	125	494
	9	120	120	119	118	477
	10	121	123	121	120	485
	11	116	119	117	115	467
	12	119	118	120	118	475
	13	132	133	131	130	526
	14	127	125	128	126	506
	15	122	120	123	121	486
	16	127	129	127	128	511
	17	124	126	125	123	498
	18	128	125	126	128	507
	19	132	132	133	131	528
	20	127	125	126	128	506
	Total	2498	2498	2496	2493	9985
	Means	124.9	124.9	124.8	124.65	124.812
			panicle length
			Cross I
			P1
	Plants	R1	R2	R3	R4	Total
	1	21	20	20	21	82
	2	20	20	20	20	80
	3	21	20	21	20	82
	4	22	22	21	21	86
	5	20	21	20	21	82
	6	21	21	21	20	83
	7	20	22	21	22	85
	8	20	20	20	20	80
	9	21	21	21	21	84
	10	22	21	21	22	86
	11	22	22	22	22	88
	12	22	22	22	22	88
	13	21	21	22	22	86
	14	22	22	22	22	88
	15	22	21	21	21	85
	16	22	22	22	22	88
	17	21	22	22	22	87
	18	22	22	22	22	88
	19	21	21	22	22	86
	20	22	21	22	21	86
	Total	425	424	425	426	1700
	Means	21.25	21.2	21.25	21.3	21.25
			P2
	Plants	R1	R2	R3	R4	Total
	1	22	22	22	23	89
	2	23	23	23	24	93
	3	23	24	24	23	94
	4	22	22	22	22	88
	5	23	24	23	24	94
	6	23	22	22	23	90
	7	24	24	23	23	94
	8	23	23	24	24	94
	9	24	23	23	24	94
	10	24	24	24	24	96
	11	23	23	24	23	93
	12	24	24	23	23	94
	13	23	22	23	22	90
	14	24	22	23	22	91
	15	23	23	23	23	92
	16	22	24	22	23	91
	17	23	24	23	24	94
	18	23	23	23	23	92
	19	23	23	23	24	93
	20	23	23	24	23	93
	Total	462	462	461	464	1849
	Means	23.1	23.1	23.05	23.2	23.1125
			F1
	Plants	R1	R2	R3	R4	Total
	1	24	25	25	24	98
	2	24	24	24	24	96
	3	25	24	25	24	98
	4	24	25	24	25	98
	5	25	24	24	25	98
	6	25	25	26	26	102
	7	26	26	25	26	103
	8	24	24	24	24	96
	9	25	24	25	24	98
	10	26	25	24	25	100
	11	25	25	24	24	98
	12	24	26	25	25	100
	13	25	24	26	25	100
	14	24	24	26	24	98
	15	25	26	24	25	100
	16	26	25	25	26	102
	17	25	24	26	25	100
	18	24	24	25	25	98
	19	24	25	24	25	98
	20	25	25	25	26	101
	Total	495	494	496	497	1982
	Means	24.75	24.7	24.8	24.85	24.775
			F2
	Plants	R1	R2	R3	R4	Total
	1	26	25	25	24	100
	2	25	24	24	25	98
	3	22	23	25	26	96
	4	24	26	26	23	99
	5	23	22	25	26	96
	6	23	22	25	26	96
	7	25	24	23	26	98
	8	26	24	22	26	98
	9	23	24	26	25	98
	10	23	24	25	23	95
	11	25	24	21	22	92
	12	24	25	22	21	92
	13	22	25	25	22	94
	14	25	22	22	25	94
	15	26	24	22	20	92
	16	22	21	26	23	92
	17	22	21	24	23	90
	18	22	20	21	23	86
	19	21	23	22	20	86
	20	23	21	22	24	90
	21	21	20	22	23	86
	22	21	21	22	22	86
	23	23	24	21	20	88
	24	20	20	22	22	84
	25	25	20	21	24	90
	26	22	24	24	21	91
	27	21	20	23	22	86
	28	24	22	22	20	88
	29	23	22	22	20	87
	30	20	22	21	20	83
	31	23	22	25	26	96
	32	25	24	23	26	98
	33	26	24	22	26	98
	34	23	24	26	25	98
	35	23	24	25	23	95
	36	25	24	21	22	92
	37	24	25	22	21	92
	38	22	25	25	22	94
	39	25	22	22	25	94
	40	26	24	22	20	92
	41	22	21	26	23	92
	42	22	21	24	23	90
	43	22	20	21	23	86
	44	21	23	22	20	86
	45	23	21	22	24	90
	46	21	20	22	23	86
	47	21	21	22	22	86
	48	23	24	21	20	88
	49	20	20	22	22	84
	50	25	20	21	24	90
	Total	1154	1128	1149	1147	4578
	Means	23.08	22.56	22.98	22.94	22.89
			BC1
	Plants	R1	R2	R3	R4	Total
	1	26	25	25	26	102
	2	26	26	26	26	104
	3	22	23	23	23	91
	4	25	24	25	24	98
	5	23	22	22	23	90
	6	25	24	25	24	98
	7	24	23	23	24	94
	8	23	22	23	22	90
	9	23	23	24	24	94
	10	24	25	25	24	98
	11	23	24	24	23	94
	12	22	22	23	23	90
	13	22	22	22	22	88
	14	23	23	23	23	92
	15	25	25	25	25	100
	16	26	26	26	26	104
	17	22	23	23	22	90
	18	23	24	24	23	94
	19	24	23	23	24	94
	20	24	24	24	24	96
	Total	475	473	478	475	1901
	Means	23.75	23.65	23.9	23.75	23.7625
			BC2
	Plants	R1	R2	R3	R4	Total
	1	23	22	23	22	90
	2	22	23	23	22	90
	3	25	25	25	25	100
	4	23	24	23	24	94
	5	23	23	23	23	92
	6	22	22	22	22	88
	7	24	24	23	23	94
	8	23	22	22	23	90
	9	23	23	23	23	92
	10	22	23	22	23	90
	11	23	24	23	24	94
	12	23	22	23	22	90
	13	24	23	23	23	93
	14	22	22	22	22	88
	15	23	24	23	24	94
	16	23	24	23	24	94
	17	24	23	24	23	94
	18	23	23	24	23	93
	19	24	24	24	24	96
	20	24	23	24	23	94
	Total	463	463	462	462	1850
	Means	23.15	23.15	23.1	23.1	23.125
			Panicle length
			Cross II
			P1
	Plants	R1	R2	R3	R4	Total	means
	1	21	22	21	22	86	21.5
	2	21	21	22	22	86	21.5
	3	22	21	22	21	86	21.5
	4	21	21	21	21	84	21
	5	21	22	21	22	86	21.5
	6	21	20	21	20	82	20.5
	7	20	21	20	21	82	20.5
	8	20	21	21	20	82	20.5
	9	20	20	20	20	80	20
	10	22	22	22	22	88	22
	11	21	21	21	21	84	21
	12	20	20	21	21	82	20.5
	13	22	22	22	22	88	22
	14	21	22	22	21	86	21.5
	15	20	20	20	20	80	20
	16	22	21	21	22	86	21.5
	17	21	22	22	21	86	21.5
	18	22	22	21	21	86	21.5
	19	21	21	22	22	86	21.5
	20	21	21	21	21	84	21
	Total	420	423	424	423	1690
	Means	21	21.15	21.2	21.15	21.125
			P2
	Plants	R1	R2	R3	R4	Total	means
	1	23	23	23	23	92	23
	2	24	24	24	24	96	24
	3	23	24	23	24	94	23.5
	4	23	23	22	22	90	22.5
	5	22	22	23	23	90	22.5
	6	24	23	24	23	94	23.5
	7	23	23	24	24	94	23.5
	8	23	24	23	24	94	23.5
	9	23	24	24	23	94	23.5
	10	24	23	24	23	94	23.5
	11	24	23	24	23	94	23.5
	12	24	23	23	24	94	23.5
	13	23	23	23	23	92	23
	14	23	24	24	23	94	23.5
	15	23	23	24	24	94	23.5
	16	23	24	23	24	94	23.5
	17	24	23	23	24	94	23.5
	18	23	24	24	23	94	23.5
	19	22	22	22	22	88	22
	20	23	23	23	23	92	23
	Total	464	465	467	466	1862
	Means	23.2	23.25	23.35	23.3	23.275
			F1
	Plants	R1	R2	R3	R4	Total	means
	1	25	26	25	26	102	25.5
	2	25	25	25	25	100	25
	3	27	28	27	27	109	27.25
	4	26	26	26	26	104	26
	5	27	28	28	27	110	27.5
	6	25	26	26	25	102	25.5
	7	28	28	27	27	110	27.5
	8	25	25	26	26	102	25.5
	9	25	25	25	25	100	25
	10	25	26	25	26	102	25.5
	11	25	26	25	26	102	25.5
	12	27	28	28	27	110	27.5
	13	26	25	25	26	102	25.5
	14	25	26	26	25	102	25.5
	15	25	25	25	25	100	25
	16	26	25	25	26	102	25.5
	17	27	26	26	27	106	26.5
	18	26	26	25	25	102	25.5
	19	27	27	28	27	109	27.25
	20	25	25	25	25	100	25
	Total	517	522	518	519	2076
	Means	25.85	26.1	25.9	25.95	25.95
			F2
	Plants	R1	R2	R3	R4	Total	means
	1	26	26	26	23	101	25.25
	2	20	20	23	22	85	21.25
	3	25	25	26	24	100	25
	4	24	25	25	24	98	24.5
	5	24	25	26	26	101	25.25
	6	21	20	25	24	90	22.5
	7	22	27	26	23	98	24.5
	8	23	20	20	24	87	21.75
	9	22	25	25	23	95	23.75
	10	23	22	21	23	89	22.25
	11	25	26	23	22	96	24
	12	26	25	24	23	98	24.5
	13	29	25	24	29	107	26.75
	14	23	23	21	20	87	21.75
	15	21	22	24	24	91	22.75
	16	22	21	23	23	89	22.25
	17	24	22	21	24	91	22.75
	18	25	23	21	25	94	23.5
	19	26	24	23	27	100	25
	20	24	23	27	26	100	25
	21	28	25	24	29	106	26.5
	22	26	26	30	30	112	28
	23	24	27	27	24	102	25.5
	24	26	26	23	22	97	24.25
	25	23	22	24	24	93	23.25
	26	24	24	21	22	91	22.75
	27	24	23	26	25	98	24.5
	28	26	26	27	23	102	25.5
	29	26	25	25	24	100	25
	30	23	26	25	23	97	24.25
	31	21	20	25	24	90	22.5
	32	22	27	26	23	98	24.5
	33	23	20	20	24	87	21.75
	34	22	25	25	23	95	23.75
	35	23	22	21	23	89	22.25
	36	25	26	23	22	96	24
	37	26	25	24	23	98	24.5
	38	29	25	24	29	107	26.75
	39	23	23	21	20	87	21.75
	40	21	22	24	24	91	22.75
	41	22	21	23	23	89	22.25
	42	24	22	21	24	91	22.75
	43	25	23	21	25	94	23.5
	44	26	24	23	27	100	25
	45	24	23	27	26	100	25
	46	28	25	24	29	106	26.5
	47	26	26	30	30	112	28
	48	24	27	27	24	102	25.5
	49	26	26	23	22	97	24.25
	50	23	22	24	24	93	23.25
	Total	1208	1193	1202	1214	4817
	Means	24.16	23.86	24.04	24.28	24.085
			BC1
	Plants	R1	R2	R3	R4	Total	means
	1	24	25	24	25	98	24.5
	2	25	24	25	24	98	24.5
	3	25	25	25	25	100	25
	4	23	23	23	23	92	23
	5	23	24	24	23	94	23.5
	6	25	24	25	24	98	24.5
	7	20	20	20	20	80	20
	8	21	22	21	22	86	21.5
	9	23	23	23	23	92	23
	10	25	24	25	24	98	24.5
	11	21	22	21	22	86	21.5
	12	23	22	23	22	90	22.5
	13	22	23	22	23	90	22.5
	14	25	24	25	24	98	24.5
	15	24	23	24	23	94	23.5
	16	20	21	20	21	82	20.5
	17	21	20	21	20	82	20.5
	18	22	22	22	22	88	22
	19	24	24	24	24	96	24
	20	25	24	25	24	98	24.5
	Total	461	459	462	458	1840
	Means	23.05	22.95	23.1	22.9	23
			BC2
	Plants	R1	R2	R3	R4	Total	means
	1	20	21	20	21	82	20.5
	2	25	26	25	26	102	25.5
	3	22	23	22	23	90	22.5
	4	28	28	28	27	111	27.75
	5	24	25	25	24	98	24.5
	6	25	24	24	25	98	24.5
	7	23	23	23	23	92	23
	8	25	24	25	24	98	24.5
	9	23	24	23	24	94	23.5
	10	25	26	25	26	102	25.5
	11	24	25	24	25	98	24.5
	12	26	25	25	26	102	25.5
	13	25	25	26	26	102	25.5
	14	26	26	25	25	102	25.5
	15	24	23	24	23	94	23.5
	16	23	24	24	23	94	23.5
	17	24	23	23	24	94	23.5
	18	25	25	24	24	98	24.5
	19	26	27	26	27	106	26.5
	20	26	26	25	26	103	25.75
	Total	489	493	486	492	1960
	Means	24.45	24.65	24.3	24.6	24.5
			number of panicles/ plant
			Cross I
			P1
	Plants	R1	R2	R3	R4	Total	means
	1	21	20	20	20	81	20.25
	2	19	21	19	21	80	20
	3	20	19	21	20	80	20
	4	19	19	18	20	76	19
	5	20	18	19	20	77	19.25
	6	19	20	19	19	77	19.25
	7	19	19	20	19	77	19.25
	8	23	24	23	23	93	23.25
	9	22	22	23	21	88	22
	10	21	23	22	22	88	22
	11	23	24	23	24	94	23.5
	12	20	20	20	19	79	19.75
	13	17	19	21	21	78	19.5
	14	20	21	19	21	81	20.25
	15	21	20	20	19	80	20
	16	20	19	20	19	78	19.5
	17	19	21	18	18	76	19
	18	20	21	19	20	80	20
	19	21	20	18	19	78	19.5
	20	21	19	18	20	78	19.5
	Total	405	409	400	405	1619
	Means	20.25	20.45	20	20.25	20.2375
			P2
	Plants	R1	R2	R3	R4	Total	means
	1	15	13	13	14	55	13.75
	2	16	16	15	17	64	16
	3	17	16	14	15	62	15.5
	4	15	14	16	15	60	15
	5	13	14	14	13	54	13.5
	6	12	10	13	11	46	11.5
	7	17	14	15	16	62	15.5
	8	15	12	13	14	54	13.5
	9	15	14	15	14	58	14.5
	10	14	13	16	15	58	14.5
	11	13	16	12	14	55	13.75
	12	12	14	11	13	50	12.5
	13	12	14	13	13	52	13
	14	13	12	12	11	48	12
	15	12	13	12	14	51	12.75
	16	14	13	14	13	54	13.5
	17	14	13	16	15	58	14.5
	18	14	14	15	15	58	14.5
	19	15	16	16	14	61	15.25
	20	13	14	13	14	54	13.5
	Total	281	275	278	280	1114
	Means	14.05	13.75	13.9	14	13.925
			F1
	Plants	R1	R2	R3	R4	Total	means
	1	21	20	20	21	82	20.5
	2	22	21	22	21	86	21.5
	3	20	20	22	21	83	20.75
	4	19	20	21	20	80	20
	5	22	21	21	22	86	21.5
	6	23	22	22	21	88	22
	7	20	22	23	23	88	22
	8	24	23	24	23	94	23.5
	9	20	22	22	21	85	21.25
	10	22	21	20	21	84	21
	11	23	23	23	23	92	23
	12	25	24	25	24	98	24.5
	13	23	22	22	23	90	22.5
	14	23	24	24	23	94	23.5
	15	22	23	23	23	91	22.75
	16	21	23	22	24	90	22.5
	17	23	24	22	23	92	23
	18	20	22	20	21	83	20.75
	19	21	22	21	22	86	21.5
	20	22	23	22	23	90	22.5
	Total	436	442	441	443	1762
	Means	21.8	22.1	22.05	22.15	22.025
			F2
	Plants	R1	R2	R3	R4	Total	means
	1	25	26	22	20	93	23.25
	2	22	25	24	23	94	23.5
	3	24	19	24	25	92	23
	4	29	20	13	28	90	22.5
	5	21	23	24	20	88	22
	6	18	26	25	17	86	21.5
	7	21	19	19	24	83	20.75
	8	16	20	29	16	81	20.25
	9	20	20	19	21	80	20
	10	21	22	18	16	77	19.25
	11	22	16	17	22	77	19.25
	12	20	21	16	17	74	18.5
	13	15	16	21	22	74	18.5
	14	18	19	18	19	74	18.5
	15	21	20	16	14	71	17.75
	16	16	16	19	20	71	17.75
	17	20	16	15	19	70	17.5
	18	17	18	19	15	69	17.25
	19	17	15	19	17	68	17
	20	14	16	18	20	68	17
	21	17	15	18	16	66	16.5
	22	20	12	15	18	65	16.25
	23	14	13	16	20	63	15.75
	24	15	19	15	14	63	15.75
	25	13	16	15	13	57	14.25
	26	16	17	11	12	56	14
	27	12	16	15	13	56	14
	28	16	15	13	11	55	13.75
	29	13	14	16	11	54	13.5
	30	12	12	14	16	54	13.5
	31	18	26	25	17	86	21.5
	32	21	19	19	24	83	20.75
	33	16	20	29	16	81	20.25
	34	20	20	19	21	80	20
	35	21	22	18	16	77	19.25
	36	22	16	17	22	77	19.25
	37	20	21	16	17	74	18.5
	38	15	16	21	22	74	18.5
	39	18	19	18	19	74	18.5
	40	21	20	16	14	71	17.75
	41	16	16	19	20	71	17.75
	42	20	16	15	19	70	17.5
	43	17	18	19	15	69	17.25
	44	17	15	19	17	68	17
	45	14	16	18	20	68	17
	46	17	15	18	16	66	16.5
	47	20	12	15	18	65	16.25
	48	14	13	16	20	63	15.75
	49	15	19	15	14	63	15.75
	50	13	16	15	13	57	14.25
	Total	900	897	910	899	3606
	Means	18	17.94	18.2	17.98	18.03
			BC1
	Plants	R1	R2	R3	R4	Total	means
	1	18	19	18	19	74	18.5
	2	16	15	15	16	62	15.5
	3	27	28	27	28	110	27.5
	4	16	17	16	17	66	16.5
	5	14	13	14	13	54	13.5
	6	15	16	15	16	62	15.5
	7	17	18	17	18	70	17.5
	8	20	21	20	21	82	20.5
	9	18	19	18	19	74	18.5
	10	19	18	19	18	74	18.5
	11	24	23	24	23	94	23.5
	12	18	19	18	19	74	18.5
	13	21	22	21	22	86	21.5
	14	17	18	17	18	70	17.5
	15	16	17	16	17	66	16.5
	16	18	17	18	17	70	17.5
	17	23	22	23	22	90	22.5
	18	20	21	20	21	82	20.5
	19	22	21	22	21	86	21.5
	20	22	23	22	23	90	22.5
	Total	381	387	380	388	1536
	Means	19.05	19.35	19	19.4	19.2
			BC2
	Plants	R1	R2	R3	R4	Total	means
	1	16	17	16	17	66	16.5
	2	15	16	15	16	62	15.5
	3	17	18	17	18	70	17.5
	4	16	15	16	15	62	15.5
	5	21	20	21	20	82	20.5
	6	13	14	13	14	54	13.5
	7	16	15	16	15	62	15.5
	8	18	17	18	17	70	17.5
	9	21	20	21	20	82	20.5
	10	15	14	15	14	58	14.5
	11	15	16	15	16	62	15.5
	12	14	15	14	15	58	14.5
	13	21	20	21	20	82	20.5
	14	23	22	23	22	90	22.5
	15	20	20	20	20	80	20
	16	17	18	17	18	70	17.5
	17	16	17	16	17	66	16.5
	18	16	15	16	15	62	15.5
	19	13	14	13	14	54	13.5
	20	19	18	19	18	74	18.5
	Total	342	341	342	341	1366
	Means	17.1	17.05	17.1	17.05	17.075
			Number of panicles/ plant
			Cross II
			P1
	Plants	R1	R2	R3	R4	Total	means
	1	16	16	16	14	62	15.5
	2	16	17	17	17	67	16.75
	3	21	20	20	19	80	20
	4	19	19	19	19	76	19
	5	16	18	17	17	68	17
	6	17	18	17	16	68	17
	7	15	15	16	18	64	16
	8	16	16	17	16	65	16.25
	9	17	16	16	18	67	16.75
	10	20	21	20	20	81	20.25
	11	18	19	18	17	72	18
	12	17	15	16	18	66	16.5
	13	16	15	18	15	64	16
	14	18	16	16	17	67	16.75
	15	19	18	18	19	74	18.5
	16	18	16	15	16	65	16.25
	17	17	15	17	17	66	16.5
	18	20	18	19	19	76	19
	19	16	17	15	16	64	16
	20	15	16	15	16	62	15.5
	Total	347	341	342	344	1374
	Means	17.35	17.05	17.1	17.2	17.175
			P2
	Plants	R1	R2	R3	R4	Total	means
	1	17	18	17	19	71	17.75
	2	20	20	21	20	81	20.25
	3	17	18	19	18	72	18
	4	19	17	19	18	73	18.25
	5	18	19	19	18	74	18.5
	6	20	18	19	19	76	19
	7	22	21	22	21	86	21.5
	8	20	22	21	20	83	20.75
	9	23	23	22	22	90	22.5
	10	21	22	22	21	86	21.5
	11	21	20	21	20	82	20.5
	12	18	19	20	19	76	19
	13	21	19	20	20	80	20
	14	21	20	21	20	82	20.5
	15	21	23	22	22	88	22
	16	20	22	21	21	84	21
	17	19	18	18	19	74	18.5
	18	21	22	20	21	84	21
	19	22	22	23	23	90	22.5
	20	23	23	22	23	91	22.75
	Total	404	406	409	404	1623
	Means	20.2	20.3	20.45	20.2	20.2875
			F1
	Plants	R1	R2	R3	R4	Total
	1	20	21	20	20	81
	2	24	23	22	23	92
	3	25	26	24	25	100
	4	20	19	21	20	80
	5	20	21	20	19	80
	6	23	22	23	22	90
	7	24	25	24	25	98
	8	24	24	24	23	95
	9	21	22	22	21	86
	10	23	24	23	24	94
	11	25	24	25	24	98
	12	24	25	24	25	98
	13	22	22	23	23	90
	14	23	24	22	23	92
	15	20	19	21	20	80
	16	23	24	22	24	93
	17	24	23	23	24	94
	18	22	23	24	23	92
	19	23	22	24	23	92
	20	24	25	24	24	97
	Total	454	458	455	455	1822
	Means	22.7	22.9	22.75	22.75	22.775
			F2
	Plants	R1	R2	R3	R4	Total
	1	24	24	24	25	97
	2	22	25	24	23	94
	3	25	26	22	20	93
	4	24	19	24	25	92
	5	29	20	13	28	90
	6	22	23	22	23	90
	7	21	23	24	20	88
	8	25	24	20	18	87
	9	18	26	25	17	86
	10	21	22	23	19	85
	11	21	19	19	24	83
	12	16	20	29	16	81
	13	18	17	20	24	79
	14	19	23	19	18	79
	15	21	22	18	16	77
	16	22	16	17	22	77
	17	20	21	16	17	74
	18	15	16	21	22	74
	19	20	21	15	16	72
	20	16	16	19	20	71
	21	20	16	15	19	70
	22	16	16	18	20	70
	23	17	15	19	17	68
	24	14	16	18	20	68
	25	17	15	18	16	66
	26	20	12	15	18	65
	27	13	16	15	13	57
	28	12	16	15	13	56
	29	16	15	13	11	55
	30	13	14	16	11	54
	31	22	23	22	23	90
	32	21	23	24	20	88
	33	25	24	20	18	87
	34	18	26	25	17	86
	35	21	22	23	19	85
	36	21	19	19	24	83
	37	16	20	29	16	81
	38	18	17	20	24	79
	39	19	23	19	18	79
	40	21	22	18	16	77
	41	22	16	17	22	77
	42	20	21	16	17	74
	43	15	16	21	22	74
	44	20	21	15	16	72
	45	16	16	19	20	71
	46	20	16	15	19	70
	47	16	16	18	20	70
	48	17	15	19	17	68
	49	14	16	18	20	68
	50	17	15	18	16	66
	Total	956	961	971	955	3843
	Means	19.12	19.22	19.42	19.1	19.215
			BC1
	Plants	R1	R2	R3	R4	Total
	1	18	19	18	19	74
	2	21	22	21	22	86
	3	21	20	21	20	82
	4	24	23	24	23	94
	5	23	24	23	24	94
	6	22	21	22	21	86
	7	15	14	15	14	58
	8	19	18	19	18	74
	9	15	14	15	14	58
	10	15	14	15	14	58
	11	20	19	20	19	78
	12	12	13	12	13	50
	13	19	18	19	18	74
	14	18	19	18	19	74
	15	20	19	20	19	78
	16	17	18	17	18	70
	17	15	16	15	16	62
	18	15	16	15	16	62
	19	20	20	20	20	80
	20	19	18	19	18	74
	Total	368	365	368	365	1466
	Means	18.4	18.25	18.4	18.25	18.325
			BC2
	Plants	R1	R2	R3	R4	Total
	1	18	19	18	19	74
	2	29	28	29	28	114
	3	19	20	19	20	78
	4	18	19	18	19	74
	5	15	18	15	18	66
	6	17	16	17	16	66
	7	17	16	17	16	66
	8	21	22	21	22	86
	9	20	19	20	19	78
	10	18	17	18	17	70
	11	14	15	14	15	58
	12	20	21	20	21	82
	13	22	23	22	23	90
	14	16	17	16	17	66
	15	21	22	21	22	86
	16	23	24	23	24	94
	17	25	25	25	25	100
	18	25	24	25	24	98
	19	22	23	22	23	90
	20	25	26	25	26	102
	Total	405	414	405	414	1638
	Means	20.25	20.7	20.25	20.7	20.475
		No. of filled grains/panicles
		Cross I
		P1
	Plants	R1	R2	R3	R4	Total
	1	150	145	150	147	592
	2	142	138	140	144	564
	3	146	145	149	150	590
	4	148	145	146	148	587
	5	135	138	135	137	545
	6	140	137	139	138	554
	7	155	153	152	153	613
	8	144	141	142	143	570
	9	152	150	151	155	608
	10	142	144	141	132	559
	11	139	142	140	137	558
	12	140	145	143	143	571
	13	140	144	142	143	569
	14	145	148	147	146	586
	15	135	133	134	131	533
	16	153	155	154	152	614
	17	144	148	146	145	583
	18	148	152	150	151	601
	19	138	140	139	135	552
	20	160	157	157	155	629
	Total	2896	2900	2897	2885	11578
	Means	144.8	145	144.85	144.25	144.725
			P2
	Plants	R1	R2	R3	R4	Total
	1	114	118	119	116	467
	2	105	107	109	110	431
	3	118	115	114	116	463
	4	123	120	121	119	483
	5	125	122	120	123	490
	6	114	116	117	115	462
	7	110	113	112	111	446
	8	115	120	118	117	470
	9	118	117	119	120	474
	10	116	119	115	118	468
	11	117	116	117	119	469
	12	113	111	115	113	452
	13	115	114	112	113	454
	14	114	116	113	115	458
	15	112	114	116	113	455
	16	115	115	113	114	457
	17	113	112	115	114	454
	18	114	113	116	115	458
	19	117	114	115	116	462
	20	116	117	114	115	462
	Total	2304	2309	2310	2312	9235
	Means	115.2	115.45	115.5	115.6	115.438
			F1
	Plants	R1	R2	R3	R4	Total
	1	104	105	102	103	414
	2	103	102	100	101	406
	3	100	99	97	98	394
	4	104	103	105	104	416
	5	105	106	105	106	422
	6	99	100	101	102	402
	7	97	84	85	86	352
	8	100	102	103	101	406
	9	106	105	103	104	418
	10	102	104	103	105	414
	11	104	101	102	104	411
	12	100	102	103	104	409
	13	105	105	106	104	420
	14	103	105	106	105	419
	15	97	99	98	97	391
	16	100	101	100	101	402
	17	93	93	90	92	368
	18	106	108	109	107	430
	19	94	97	97	95	383
	20	100	103	102	103	408
	Total	2022	2024	2017	2022	8085
	Means	101.1	101.2	100.85	101.1	101.062
			F2
	Plants	R1	R2	R3	R4	Total
	1	111	112	115	109	447
	2	115	109	108	113	445
	3	100	105	117	113	435
	4	106	108	107	112	433
	5	114	112	105	100	431
	6	104	106	110	110	430
	7	104	102	105	115	426
	8	107	105	103	106	421
	9	115	106	105	95	421
	10	105	103	100	110	418
	11	103	100	106	107	416
	12	110	96	102	105	413
	13	104	95	97	110	406
	14	107	101	102	94	404
	15	98	100	105	99	402
	16	100	104	103	95	402
	17	97	105	98	98	398
	18	97	100	99	98	394
	19	100	97	99	98	394
	20	94	100	103	94	391
	21	98	96	95	97	386
	22	93	97	99	95	384
	23	90	96	104	91	381
	24	91	93	95	98	377
	25	93	95	97	92	377
	26	95	93	94	94	376
	27	92	90	95	96	373
	28	85	94	102	88	369
	29	86	103	90	87	366
	30	88	90	93	95	366
	31	104	106	110	110	430
	32	104	102	105	115	426
	33	107	105	103	106	421
	34	115	106	105	95	421
	35	105	103	100	110	418
	36	103	100	106	107	416
	37	110	96	102	105	413
	38	104	95	97	110	406
	39	107	101	102	94	404
	40	98	100	105	99	402
	41	100	104	103	95	402
	42	97	105	98	98	398
	43	97	100	99	98	394
	44	100	97	99	98	394
	45	94	100	103	94	391
	46	98	96	95	97	386
	47	93	97	99	95	384
	48	90	96	104	91	381
	49	91	93	95	98	377
	50	93	95	97	92	377
	Total	5012	5010	5080	5021	20123
	Means	100.24	100.2	101.6	100.42	100.615
			BC1
	Plants	R1	R2	R3	R4	Total
	1	115	115	113	115	458
	2	120	122	118	117	477
	3	122	120	120	119	481
	4	125	123	126	128	502
	5	128	130	129	132	519
	6	130	133	131	133	527
	7	133	130	131	135	529
	8	134	132	133	135	534
	9	136	135	134	133	538
	10	138	140	141	142	561
	11	133	130	132	129	524
	12	141	142	142	145	570
	13	145	144	146	143	578
	14	143	145	144	140	572
	15	150	152	151	153	606
	16	152	154	154	155	615
	17	144	145	148	150	587
	18	135	136	135	130	536
	19	120	118	122	117	477
	20	144	140	146	143	573
	Total	2688	2686	2696	2694	10764
	Means	134.4	134.3	134.8	134.7	134.55
			BC2
	Plants	R1	R2	R3	R4	Total
	1	100	98	99	99	396
	2	93	87	90	91	361
	3	82	85	83	84	334
	4	100	102	100	103	405
	5	102	103	99	100	404
	6	91	95	94	93	373
	7	80	85	83	83	331
	8	83	84	82	84	333
	9	85	83	84	84	336
	10	88	87	86	87	348
	11	89	89	90	88	356
	12	87	89	91	92	359
	13	105	104	105	104	418
	14	88	89	90	91	358
	15	89	89	92	90	360
	16	91	92	90	92	365
	17	94	94	93	92	373
	18	103	100	102	101	406
	19	105	104	103	104	416
	20	101	100	102	102	405
	Total	1856	1859	1858	1864	7437
	Means	92.8	92.95	92.9	93.2	92.9625
			No. of filled grains/panicles
			Cross II
			P1
	Plants	R1	R2	R3	R4	Total	means
	1	120	122	121	123	486	121.5
	2	110	109	112	110	441	110.25
	3	112	114	115	112	453	113.25
	4	114	112	113	111	450	112.5
	5	116	117	114	114	461	115.25
	6	118	120	117	119	474	118.5
	7	120	121	121	118	480	120
	8	122	120	120	119	481	120.25
	9	124	122	123	125	494	123.5
	10	126	128	127	125	506	126.5
	11	128	126	130	124	508	127
	12	130	132	131	135	528	132
	13	111	114	113	115	453	113.25
	14	113	111	112	114	450	112.5
	15	115	117	116	113	461	115.25
	16	117	115	116	118	466	116.5
	17	119	117	118	116	470	117.5
	18	121	119	122	120	482	120.5
	19	123	125	120	121	489	122.25
	20	125	127	126	130	508	127
	Total	2384	2388	2387	2382	9541
	Means	119.2	119.4	119.35	119.1	119.263
			P2
	Plants	R1	R2	R3	R4	Total	means
	1	160	158	157	159	634	158.5
	2	162	164	163	160	649	162.25
	3	164	160	162	163	649	162.25
	4	166	163	165	164	658	164.5
	5	168	165	166	167	666	166.5
	6	170	168	169	169	676	169
	7	172	170	173	171	686	171.5
	8	174	173	172	175	694	173.5
	9	176	176	177	177	706	176.5
	10	178	175	176	179	708	177
	11	180	180	178	179	717	179.25
	12	161	158	159	160	638	159.5
	13	163	160	161	162	646	161.5
	14	165	163	164	164	656	164
	15	167	170	168	169	674	168.5
	16	169	171	170	172	682	170.5
	17	171	172	173	173	689	172.25
	18	173	175	174	175	697	174.25
	19	175	179	178	177	709	177.25
	20	177	180	179	178	714	178.5
	Total	3391	3380	3384	3393	13548
	Means	169.55	169	169.2	169.65	169.35
			F1
	Plants	R1	R2	R3	R4	Total	means
	1	170	172	175	173	690	172.5
	2	172	170	174	172	688	172
	3	174	176	173	175	698	174.5
	4	176	176	176	176	704	176
	5	178	175	176	177	706	176.5
	6	180	182	178	179	719	179.75
	7	182	181	179	182	724	181
	8	184	180	182	181	727	181.75
	9	186	188	187	186	747	186.75
	10	188	186	185	184	743	185.75
	11	190	187	185	186	748	187
	12	171	168	169	170	678	169.5
	13	173	170	172	171	686	171.5
	14	175	177	175	176	703	175.75
	15	177	175	177	177	706	176.5
	16	179	182	183	180	724	181
	17	181	181	182	181	725	181.25
	18	183	182	184	185	734	183.5
	19	185	188	188	187	748	187
	20	187	190	191	189	757	189.25
	Total	3591	3586	3591	3587	14355
	Means	179.55	179.3	179.55	179.35	179.438
			F2
	Plants	R1	R2	R3	R4	Total	means
	1	170	166	169	168	673	168.25
	2	155	160	179	178	672	168
	3	176	150	175	160	661	165.25
	4	160	158	159	158	635	158.75
	5	166	148	150	164	628	157
	6	159	162	140	159	620	155
	7	152	150	151	151	604	151
	8	155	140	145	152	592	148
	9	130	158	156	144	588	147
	10	148	151	149	140	588	147
	11	145	149	147	140	581	145.25
	12	130	150	152	137	569	142.25
	13	144	140	142	143	569	142.25
	14	142	150	141	133	566	141.5
	15	140	142	140	141	563	140.75
	16	140	138	139	142	559	139.75
	17	138	133	137	150	558	139.5
	18	142	145	122	144	553	138.25
	19	139	142	120	141	542	135.5
	20	135	138	137	120	530	132.5
	21	130	143	131	122	526	131.5
	22	129	131	133	134	527	131.75
	23	133	130	132	131	526	131.5
	24	130	128	129	131	518	129.5
	25	130	137	128	120	515	128.75
	26	129	118	127	139	513	128.25
	27	120	130	140	120	510	127.5
	28	128	125	128	127	508	127
	29	125	118	127	138	508	127
	30	129	125	124	125	503	125.75
	31	159	162	140	159	620	155
	32	152	150	151	151	604	151
	33	155	140	145	152	592	148
	34	130	158	156	144	588	147
	35	148	151	149	140	588	147
	36	145	149	147	140	581	145.25
	37	130	150	152	137	569	142.25
	38	144	140	142	143	569	142.25
	39	142	150	141	133	566	141.5
	40	140	142	140	141	563	140.75
	41	140	138	139	142	559	139.75
	42	138	133	137	150	558	139.5
	43	142	145	122	144	553	138.25
	44	139	142	120	141	542	135.5
	45	135	138	137	120	530	132.5
	46	130	143	131	122	526	131.5
	47	129	131	133	134	527	131.75
	48	133	130	132	131	526	131.5
	49	130	128	129	131	518	129.5
	50	130	137	128	120	515	128.75
	Total	7040	7112	7020	7027	28199
	Means	140.8	142.24	140.4	140.54	140.995
			BC1
	Plants	R1	R2	R3	R4	Total	means
	1	140	143	144	142	569	142.25
	2	133	130	132	131	526	131.5
	3	130	132	131	130	523	130.75
	4	120	122	121	121	484	121
	5	119	122	120	120	481	120.25
	6	142	140	143	141	566	141.5
	7	130	128	133	132	523	130.75
	8	135	133	132	134	534	133.5
	9	125	122	123	124	494	123.5
	10	115	113	116	114	458	114.5
	11	144	146	145	145	580	145
	12	122	125	124	123	494	123.5
	13	106	108	109	107	430	107.5
	14	137	140	141	139	557	139.25
	15	133	130	131	132	526	131.5
	16	140	142	141	141	564	141
	17	135	133	134	134	536	134
	18	125	122	123	124	494	123.5
	19	127	130	132	129	518	129.5
	20	125	123	124	124	496	124
	Total	2583	2584	2599	2587	10353
	Means	129.15	129.2	129.95	129.35	129.412
			BC2
	Plants	R1	R2	R3	R4	Total	means
	1	160	163	162	164	649	162.25
	2	162	160	161	162	645	161.25
	3	164	162	163	160	649	162.25
	4	166	164	165	161	656	164
	5	168	165	166	168	667	166.75
	6	170	168	169	169	676	169
	7	172	174	173	170	689	172.25
	8	174	176	175	172	697	174.25
	9	176	179	178	175	708	177
	10	178	180	179	177	714	178.5
	11	180	182	181	183	726	181.5
	12	161	164	163	162	650	162.5
	13	180	182	181	179	722	180.5
	14	180	183	182	184	729	182.25
	15	165	163	162	162	652	163
	16	166	164	162	163	655	163.75
	17	167	165	164	165	661	165.25
	18	170	168	172	168	678	169.5
	19	177	175	178	174	704	176
	20	180	182	181	183	726	181.5
	Total	3416	3419	3417	3401	13653
	Means	170.8	170.95	170.85	170.05	170.663
			1000- grain weight normal
			Cross I
			P1
	Plants	R1	R2	R3	R4	Total	means
	1	20.2	21.21	20.2	21.21	82.82	20.705
	2	20.2	21.21	20.2	20.2	81.81	20.4525
	3	21.21	22.22	21.21	22.22	86.86	21.715
	4	22.22	21.21	22.22	21.21	86.86	21.715
	5	20.2	20.2	20.2	20.2	80.8	20.2
	6	21.21	22.22	21.21	21.21	85.85	21.4625
	7	22.22	21.21	22.22	21.21	86.86	21.715
	8	20.2	21.21	20.2	20.2	81.81	20.4525
	9	21.21	21.21	21.21	21.21	84.84	21.21
	10	22.22	22.22	22.22	21.21	87.87	21.9675
	11	20.2	21.21	20.2	21.21	82.82	20.705
	12	21.21	21.21	21.21	21.21	84.84	21.21
	13	22.22	21.21	22.22	21.21	86.86	21.715
	14	20.2	20.2	20.2	20.2	80.8	20.2
	15	21.21	20.2	21.21	20.2	82.82	20.705
	16	22.22	20.2	22.22	21.21	85.85	21.4625
	17	20.2	20.2	20.2	20.2	80.8	20.2
	18	21.21	22.22	21.21	22.22	86.86	21.715
	19	22.22	21.21	22.22	21.21	86.86	21.715
	20	20.2	21.21	20.2	21.21	82.82	20.705
	Total	422.18	423.19	422.18	420.16	1687.71
	Means	21.109	21.1595	21.109	21.008	21.0964
			P2
	Plants	R1	R2	R3	R4	Total	means
	1	29.593	30.3	29.29	30.3	119.483	29.8707
	2	29.29	29.29	30.3	29.29	118.17	29.5425
	3	30.3	30.3	29.29	29.29	119.18	29.795
	4	31.31	31.31	30.3	30.3	123.22	30.805
	5	31.31	30.3	31.31	30.3	123.22	30.805
	6	30.3	29.29	30.3	29.29	119.18	29.795
	7	31.31	30.3	30.3	30.3	122.21	30.5525
	8	29.29	30.3	29.29	30.3	119.18	29.795
	9	30.3	31.31	30.3	31.31	123.22	30.805
	10	31.31	30.3	31.31	30.3	123.22	30.805
	11	29.29	30.3	29.29	30.3	119.18	29.795
	12	30.3	31.31	30.3	31.31	123.22	30.805
	13	31.31	31.31	31.31	31.31	125.24	31.31
	14	29.29	29.29	29.29	29.29	117.16	29.29
	15	30.3	31.31	30.3	31.31	123.22	30.805
	16	31.31	30.3	31.31	30.3	123.22	30.805
	17	29.29	30.3	30.3	30.3	120.19	30.0475
	18	30.3	30.3	31.31	30.3	122.21	30.5525
	19	31.31	30.3	31.31	30.3	123.22	30.805
	20	29.29	30.3	30.3	30.3	120.19	30.0475
	Total	606.303	608.02	607.01	606	2427.33
	Means	30.3151	30.401	30.3505	30.3	30.3417
			F1
	Plants	R1	R2	R3	R4	Total	means
	1	27.27	26.26	27.27	26.26	107.06	26.765
	2	26.26	27.27	26.26	27.27	107.06	26.765
	3	27.27	28.28	27.27	28.28	111.1	27.775
	4	28.28	27.27	28.28	27.27	111.1	27.775
	5	26.26	27.27	26.26	26.26	106.05	26.5125
	6	27.27	27.27	27.27	27.27	109.08	27.27
	7	28.28	27.27	28.28	28.28	112.11	28.0275
	8	26.26	26.26	26.26	26.26	105.04	26.26
	9	27.27	28.28	27.27	28.28	111.1	27.775
	10	28.28	27.27	28.28	27.27	111.1	27.775
	11	26.26	27.27	26.26	27.27	107.06	26.765
	12	27.27	26.26	27.27	26.26	107.06	26.765
	13	28.28	27.27	28.28	27.27	111.1	27.775
	14	26.26	27.27	26.26	27.27	107.06	26.765
	15	27.27	27.27	27.27	27.27	109.08	27.27
	16	28.28	28.28	28.28	28.28	113.12	28.28
	17	26.26	27.27	26.26	27.27	107.06	26.765
	18	27.27	27.27	27.27	27.27	109.08	27.27
	19	28.28	28.28	28.28	28.28	113.12	28.28
	20	26.26	27.27	26.26	26.26	106.05	26.5125
	Total	544.39	546.41	544.39	545.4	2180.59
	Means	27.2195	27.3205	27.2195	27.27	27.2574
			F2
	Plants	R1	R2	R3	R4	Total	means
	1	27.27	27.27	27.27	27.27	109.08	27.27
	2	27.27	26.26	25.25	28.28	107.06	26.765
	3	26.26	26.26	28.28	27.27	108.07	27.0175
	4	26.26	27.27	26.26	27.27	107.06	26.765
	5	27.27	26.26	25.25	28.28	107.06	26.765
	6	26.26	27.27	26.26	27.27	107.06	26.765
	7	27.27	28.28	27.27	24.24	107.06	26.765
	8	27.27	26.26	27.27	26.26	107.06	26.765
	9	24.24	25.25	26.26	27.27	103.02	25.755
	10	23.23	27.27	27.27	25.25	103.02	25.755
	11	23.23	27.27	27.27	24.24	102.01	25.5025
	12	23.23	25.25	27.27	27.27	103.02	25.755
	13	27.27	28.28	23.23	24.24	103.02	25.755
	14	22.22	24.24	28.28	28.28	103.02	25.755
	15	28.28	28.28	22.22	24.24	103.02	25.755
	16	24.24	28.28	27.27	22.22	102.01	25.5025
	17	28.28	25.25	24.24	25.25	103.02	25.755
	18	25.25	26.26	25.25	26.26	103.02	25.755
	19	26.26	25.25	26.26	25.25	103.02	25.755
	20	26.26	27.27	23.23	25.25	102.01	25.5025
	21	25.25	26.26	23.23	24.24	98.98	24.745
	22	23.23	23.23	27.27	25.25	98.98	24.745
	23	26.26	23.23	22.22	27.27	98.98	24.745
	24	23.23	22.22	27.27	26.26	98.98	24.745
	25	26.26	23.23	22.22	27.27	98.98	24.745
	26	20.2	22.22	28.28	28.28	98.98	24.745
	27	24.24	25.25	24.24	25.25	98.98	24.745
	28	25.25	27.27	23.23	24.24	99.99	24.9975
	29	27.27	28.28	21.21	20.2	96.96	24.24
	30	24.24	24.24	23.23	24.24	95.95	23.9875
	31	26.26	27.27	26.26	27.27	107.06	26.765
	32	27.27	28.28	27.27	24.24	107.06	26.765
	33	27.27	26.26	27.27	26.26	107.06	26.765
	34	24.24	25.25	26.26	27.27	103.02	25.755
	35	23.23	27.27	27.27	25.25	103.02	25.755
	36	23.23	27.27	27.27	24.24	102.01	25.5025
	37	23.23	25.25	27.27	27.27	103.02	25.755
	38	27.27	28.28	23.23	24.24	103.02	25.755
	39	22.22	24.24	28.28	28.28	103.02	25.755
	40	28.28	28.28	22.22	24.24	103.02	25.755
	41	24.24	28.28	27.27	22.22	102.01	25.5025
	42	28.28	25.25	24.24	25.25	103.02	25.755
	43	25.25	26.26	25.25	26.26	103.02	25.755
	44	26.26	25.25	26.26	25.25	103.02	25.755
	45	26.26	27.27	23.23	25.25	102.01	25.5025
	46	25.25	26.26	23.23	24.24	98.98	24.745
	47	23.23	23.23	27.27	25.25	98.98	24.745
	48	26.26	23.23	22.22	27.27	98.98	24.745
	49	23.23	22.22	27.27	26.26	98.98	24.745
	50	26.26	23.23	22.22	27.27	98.98	24.745
	Total	1269.57	1296.84	1274.62	1286.74	5127.77
	Means	25.3914	25.9368	25.4924	25.7348	25.6388
			BC1
	Plants	R1	R2	R3	R4	Total	means
	1	22.2	23.2	22.2	23.2	90.8	22.7
	2	21.2	21.2	21.2	21.2	84.8	21.2
	3	22.2	22.2	22.2	22.2	88.8	22.2
	4	23.2	23.2	23.2	23.2	92.8	23.2
	5	22.2	22.2	22.2	22.2	88.8	22.2
	6	22.2	21.2	22.2	21.2	86.8	21.7
	7	23.2	23.2	23.2	23.2	92.8	23.2
	8	23.2	23.2	22.2	22.2	90.8	22.7
	9	23.2	24.2	23.2	24.2	94.8	23.7
	10	23.2	22.2	23.2	22.2	90.8	22.7
	11	23.2	22.2	22.2	23.2	90.8	22.7
	12	22.2	23.2	22.2	24.2	91.8	22.95
	13	23.2	24.2	23.2	24.2	94.8	23.7
	14	21.2	21.2	21.2	22.2	85.8	21.45
	15	22.2	22.2	22.2	22.2	88.8	22.2
	16	23.2	23.2	23.2	24.2	93.8	23.45
	17	24.2	24.2	24.2	22.2	94.8	23.7
	18	22.2	21.2	22.2	21.2	86.8	21.7
	19	23.2	22.2	23.2	22.2	90.8	22.7
	20	24.2	23.2	23.2	23.2	93.8	23.45
	Total	455	453	452	454	1814
	Means	22.75	22.65	22.6	22.7	22.675
			BC2
	Plants	R1	R2	R3	R4	Total	means
	1	26.3	25.3	26.3	25.3	103.2	25.8
	2	25.3	26.3	25.3	26.3	103.2	25.8
	3	24.2	24.2	24.2	24.2	96.8	24.2
	4	27.3	26.3	27.3	27.3	108.2	27.05
	5	25.3	26.3	25.3	26.3	103.2	25.8
	6	26.3	27.3	26.3	27.3	107.2	26.8
	7	27.3	27.3	27.3	27.3	109.2	27.3
	8	25.3	26.3	25.3	26.3	103.2	25.8
	9	26.3	25.3	26.3	26.3	104.2	26.05
	10	27.3	26.3	27.3	26.3	107.2	26.8
	11	25.3	26.3	25.3	26.3	103.2	25.8
	12	26.3	27.3	26.3	27.3	107.2	26.8
	13	27.3	27.3	27.3	27.3	109.2	27.3
	14	24.2	24.2	25.3	24.2	97.9	24.475
	15	26.3	27.3	27.3	26.3	107.2	26.8
	16	27.3	26.3	26.3	27.3	107.2	26.8
	17	27.3	27.3	27.3	27.3	109.2	27.3
	18	26.3	25.3	25.3	25.3	102.2	25.55
	19	27.3	27.3	26.3	27.3	108.2	27.05
	20	27.3	26.3	27.3	26.3	107.2	26.8
	Total	525.8	525.8	524.9	527.8	2104.3
	Means	26.29	26.29	26.245	26.39	26.3038
			1000-grain weight
			Cross II
			P1
	Plants	R1	R2	R3	R4	Total	means
	1	29.145	30.15	29.145	30.15	118.59	29.6475
	2	30.15	30.15	30.15	30.15	120.6	30.15
	3	30.15	31.155	30.15	31.155	122.61	30.6525
	4	30.15	29.145	30.15	29.145	118.59	29.6475
	5	30.15	30.15	30.15	30.15	120.6	30.15
	6	29.145	29.145	29.949	29.145	117.384	29.346
	7	30.15	29.145	30.15	29.145	118.59	29.6475
	8	30.15	29.145	28.14	29.145	116.58	29.145
	9	31.155	30.15	31.155	30.15	122.61	30.6525
	10	30.15	29.145	30.15	29.145	118.59	29.6475
	11	30.15	30.15	30.15	30.15	120.6	30.15
	12	31.155	30.15	31.155	30.15	122.61	30.6525
	13	30.15	29.145	30.15	29.145	118.59	29.6475
	14	30.15	30.15	30.15	30.15	120.6	30.15
	15	29.145	30.15	29.145	30.15	118.59	29.6475
	16	30.15	30.15	30.15	30.15	120.6	30.15
	17	31.155	31.155	31.155	31.155	124.62	31.155
	18	29.145	30.15	29.145	30.15	118.59	29.6475
	19	30.15	31.155	30.15	31.155	122.61	30.6525
	20	29.145	30.15	29.145	30.15	118.59	29.6475
	Total	600.99	599.985	599.784	599.985	2400.74
	Means	30.0495	29.9992	29.9892	29.9992	30.0093
			P2
	Plants	R1	R2	R3	R4	Total	means
	1	22.11	23.115	22.11	23.115	90.45	22.6125
	2	21.105	22.11	21.105	22.11	86.43	21.6075
	3	22.11	21.105	22.11	21.105	86.43	21.6075
	4	23.115	22.11	23.115	22.11	90.45	22.6125
	5	21.105	22.11	21.105	22.11	86.43	21.6075
	6	22.11	23.115	22.11	23.115	90.45	22.6125
	7	23.115	23.115	23.115	23.115	92.46	23.115
	8	23.115	22.11	23.115	22.11	90.45	22.6125
	9	22.11	22.11	22.11	22.11	88.44	22.11
	10	23.115	22.11	23.115	22.11	90.45	22.6125
	11	23.115	22.11	22.11	23.115	90.45	22.6125
	12	22.11	21.105	22.11	21.105	86.43	21.6075
	13	23.115	23.115	23.115	23.115	92.46	23.115
	14	23.115	22.11	23.115	22.11	90.45	22.6125
	15	22.11	23.115	22.11	22.11	89.445	22.3613
	16	23.115	22.11	23.115	23.115	91.455	22.8637
	17	23.115	23.115	23.115	23.115	92.46	23.115
	18	22.11	23.115	22.11	23.115	90.45	22.6125
	19	23.115	22.11	23.115	22.11	90.45	22.6125
	20	21.105	21.105	21.105	21.105	84.42	21.105
	Total	449.235	446.22	448.23	447.225	1790.91
	Means	22.4618	22.311	22.4115	22.3613	22.3864
			F1
	Plants	R1	R2	R3	R4	Total	means
	1	25.125	26.13	25.125	26.13	102.51	25.6275
	2	25.125	26.13	25.125	26.13	102.51	25.6275
	3	26.13	25.125	26.13	25.125	102.51	25.6275
	4	27.135	26.13	27.135	26.13	106.53	26.6325
	5	25.125	26.13	25.125	26.13	102.51	25.6275
	6	26.13	27.135	26.13	27.135	106.53	26.6325
	7	27.135	26.13	27.135	26.13	106.53	26.6325
	8	25.125	26.13	25.125	26.13	102.51	25.6275
	9	26.13	26.13	26.13	26.13	104.52	26.13
	10	27.135	26.13	27.135	26.13	106.53	26.6325
	11	25.125	25.125	25.125	25.125	100.5	25.125
[truncated: 2,225 more rows]

## Sheet: Table S5
Table S5: Mean performance of the six populations for rice root, yield and its components characters in the two studied ‎crosses under water deficit (D) conditions.‎
			Duration
			Cross I
			P1
	Plants	R1	R2	R3	R4	Total	means
	1	135	137	137	136	545	136.25
	2	136	134	136	135	541	135.25
	3	132	132	135	134	533	133.25
	4	134	133	134	133	534	133.5
	5	131	134	133	132	530	132.5
	6	133	129	130	131	523	130.75
	7	132	130	131	133	526	131.5
	8	135	135	134	134	538	134.5
	9	138	137	137	138	550	137.5
	10	131	135	133	134	533	133.25
	11	134	137	136	135	542	135.5
	12	133	133	135	134	535	133.75
	13	134	132	133	136	535	133.75
	14	135	131	135	134	535	133.75
	15	132	131	131	132	526	131.5
	16	131	134	134	133	532	133
	17	138	138	137	137	550	137.5
	18	130	135	134	133	532	133
	19	135	134	133	132	534	133.5
	20	137	136	138	137	548	137
	Total	2676	2677	2686	2683	10722
	Means	133.8	133.85	134.3	134.15	134.025
			P2
	Plants	R1	R2	R3	R4	Total	means
	1	124	124	124	123	495	123.75
	2	124	123	124	122	493	123.25
	3	127	124	123	125	499	124.75
	4	124	123	125	125	497	124.25
	5	126	123	126	124	499	124.75
	6	125	122	119	120	486	121.5
	7	124	121	120	122	487	121.75
	8	121	127	121	124	493	123.25
	9	122	123	122	124	491	122.75
	10	123	125	123	124	495	123.75
	11	124	124	124	124	496	124
	12	125	123	125	123	496	124
	13	126	122	126	125	499	124.75
	14	125	121	124	126	496	124
	15	124	125	123	124	496	124
	16	123	126	124	124	497	124.25
	17	122	124	122	125	493	123.25
	18	124	124	123	124	495	123.75
	19	121	122	125	123	491	122.75
	20	121	123	124	121	489	122.25
	Total	2475	2469	2467	2472	9883
	Means	123.75	123.45	123.35	123.6	123.537
			F1
	Plants	R1	R2	R3	R4	Total	means
	1	129	128	127	128	512	128
	2	129	131	126	129	515	128.75
	3	131	130	127	128	516	129
	4	131	129	122	125	507	126.75
	5	130	128	123	127	508	127
	6	129	130	124	126	509	127.25
	7	130	132	131	130	523	130.75
	8	131	131	130	129	521	130.25
	9	127	130	129	128	514	128.5
	10	128	129	128	129	514	128.5
	11	129	128	127	128	512	128
	12	128	127	126	129	510	127.5
	13	125	126	125	126	502	125.5
	14	127	125	130	128	510	127.5
	15	128	124	123	125	500	125
	16	126	127	130	127	510	127.5
	17	125	128	131	126	510	127.5
	18	124	127	132	125	508	127
	19	123	126	127	124	500	125
	20	129	125	128	128	510	127.5
	Total	2559	2561	2546	2545	10211
	Means	127.95	128.05	127.3	127.25	127.638
			F2
	Plants	R1	R2	R3	R4	Total	means
	1	132	133	124	125	514	128.5
	2	116	132	131	119	498	124.5
	3	130	131	116	120	497	124.25
	4	118	130	129	122	499	124.75
	5	134	134	123	130	521	130.25
	6	120	128	132	120	500	125
	7	135	123	125	133	516	129
	8	132	136	131	134	533	133.25
	9	131	133	118	118	500	125
	10	135	136	117	116	504	126
	11	126	125	134	134	519	129.75
	12	137	115	118	136	506	126.5
	13	131	115	114	133	493	123.25
	14	118	129	134	115	496	124
	15	129	119	117	130	495	123.75
	16	129	133	119	123	504	126
	17	121	117	130	123	491	122.75
	18	124	116	131	125	496	124
	19	124	115	132	129	500	125
	20	118	114	133	130	495	123.75
	21	124	126	130	131	511	127.75
	22	118	127	129	133	507	126.75
	23	122	133	128	129	512	128
	24	129	128	121	133	511	127.75
	25	133	129	125	123	510	127.5
	26	127	127	134	130	518	129.5
	27	123	125	130	121	499	124.75
	28	130	117	123	122	492	123
	29	127	130	132	126	515	128.75
	30	118	125	124	116	483	120.75
	31	137	115	118	136	506	126.5
	32	131	115	114	133	493	123.25
	33	118	129	134	115	496	124
	34	129	119	117	130	495	123.75
	35	129	133	119	123	504	126
	36	121	117	130	123	491	122.75
	37	124	116	131	125	496	124
	38	124	115	132	129	500	125
	39	118	114	133	130	495	123.75
	40	124	126	130	131	511	127.75
	41	135	136	117	116	504	126
	42	126	125	134	134	519	129.75
	43	137	115	118	136	506	126.5
	44	131	115	114	133	493	123.25
	45	118	129	134	115	496	124
	46	129	119	117	130	495	123.75
	47	129	133	119	123	504	126
	48	121	117	130	123	491	122.75
	49	124	116	131	125	496	124
	50	124	115	132	129	500	125
	Total	6320	6200	6288	6318	25126
	Means	126.4	124	125.76	126.36	125.63
			BC1
	Plants	R1	R2	R3	R4	Total	means
	1	129	125	128	124	506	126.5
	2	120	124	121	125	490	122.5
	3	136	132	135	131	534	133.5
	4	130	134	131	135	530	132.5
	5	124	120	123	119	486	121.5
	6	120	129	120	125	494	123.5
	7	120	128	121	127	496	124
	8	122	126	123	127	498	124.5
	9	128	124	127	123	502	125.5
	10	124	125	124	124	497	124.25
	11	130	126	129	125	510	127.5
	12	129	125	128	124	506	126.5
	13	131	127	130	126	514	128.5
	14	131	127	130	126	514	128.5
	15	128	124	127	123	502	125.5
	16	118	122	119	123	482	120.5
	17	123	119	122	118	482	120.5
	18	130	134	131	135	530	132.5
	19	125	121	124	120	490	122.5
	20	125	129	126	130	510	127.5
	Total	2523	2521	2519	2510	10073
	Means	126.15	126.05	125.95	125.5	125.912
			BC2
	Plants	R1	R2	R3	R4	Total	means
	1	124	128	125	129	506	126.5
	2	125	130	126	127	508	127
	3	123	127	124	128	502	125.5
	4	116	120	117	121	474	118.5
	5	125	121	124	120	490	122.5
	6	118	126	118	123	485	121.25
	7	124	128	125	129	506	126.5
	8	120	124	121	125	490	122.5
	9	125	121	124	120	490	122.5
	10	126	122	125	121	494	123.5
	11	127	123	126	122	498	124.5
	12	125	121	124	120	490	122.5
	13	126	122	125	121	494	123.5
	14	128	124	127	123	502	125.5
	15	129	125	128	124	506	126.5
	16	120	124	121	125	490	122.5
	17	123	119	122	118	482	120.5
	18	127	131	128	132	518	129.5
	19	123	127	124	128	502	125.5
	20	125	121	124	120	490	122.5
	Total	2479	2484	2478	2476	9917
	Means	123.95	124.2	123.9	123.8	123.963
			Duration
			Cross II
			P1
	Plants	R1	R2	R3	R4	Total	means
	1	137	138	137	137	549	137.25
	2	138	138	135	139	550	137.5
	3	137	134	135	136	542	135.5
	4	139	135	137	138	549	137.25
	5	138	136	138	140	552	138
	6	138	137	137	135	547	136.75
	7	135	135	136	137	543	135.75
	8	135	136	135	137	543	135.75
	9	136	135	135	137	543	135.75
	10	137	138	136	135	546	136.5
	11	138	139	137	138	552	138
	12	139	138	138	140	555	138.75
	13	137	136	138	136	547	136.75
	14	139	135	139	138	551	137.75
	15	136	135	138	135	544	136
	16	135	139	137	138	549	137.25
	17	137	140	137	136	550	137.5
	18	139	137	139	135	550	137.5
	19	137	138	137	136	548	137
	20	137	138	137	138	550	137.5
	Total	2744	2737	2738	2741	10960
	Means	137.2	136.85	136.9	137.05	137
			P2
	Plants	R1	R2	R3	R4	Total	means
	1	136	135	137	137	545	136.25
	2	140	135	139	139	553	138.25
	3	139	139	138	136	552	138
	4	138	139	137	138	552	138
	5	137	137	136	140	550	137.5
	6	132	136	134	135	537	134.25
	7	133	131	140	137	541	135.25
	8	134	132	139	137	542	135.5
	9	135	133	138	137	543	135.75
	10	136	134	137	135	542	135.5
	11	137	135	136	138	546	136.5
	12	138	136	135	140	549	137.25
	13	139	137	134	136	546	136.5
	14	140	138	133	138	549	137.25
	15	132	139	135	135	541	135.25
	16	133	131	137	138	539	134.75
	17	134	132	139	136	541	135.25
	18	135	133	138	135	541	135.25
	19	136	134	137	136	543	135.75
	20	137	135	137	138	547	136.75
	Total	2721	2701	2736	2741	10899
	Means	136.05	135.05	136.8	137.05	136.238
			F1
	Plants	R1	R2	R3	R4	Total	means
	1	140	139	141	139	559	139.75
	2	144	141	145	142	572	143
	3	143	136	142	140	561	140.25
	4	142	137	143	139	561	140.25
	5	141	138	142	140	561	140.25
	6	136	143	137	141	557	139.25
	7	137	142	138	140	557	139.25
	8	138	141	139	141	559	139.75
	9	139	140	140	139	558	139.5
	10	140	139	141	140	560	140
	11	141	138	142	140	561	140.25
	12	142	137	143	138	560	140
	13	143	142	141	142	568	142
	14	144	143	145	144	576	144
	15	137	140	140	139	556	139
	16	138	141	139	140	558	139.5
	17	137	142	138	139	556	139
	18	136	140	137	138	551	137.75
	19	140	139	139	140	558	139.5
	20	138	139	135	137	549	137.25
	Total	2796	2797	2807	2798	11198
	Means	139.8	139.85	140.35	139.9	139.975
			F2
	Plants	R1	R2	R3	R4	Total	means
	1	137	138	129	130	534	133.5
	2	121	137	136	124	518	129.5
	3	135	136	121	125	517	129.25
	4	123	135	134	127	519	129.75
	5	139	139	128	135	541	135.25
	6	125	133	137	125	520	130
	7	140	128	130	138	536	134
	8	134	138	133	136	541	135.25
	9	136	138	123	123	520	130
	10	134	135	116	115	500	125
	11	131	130	139	139	539	134.75
	12	137	115	118	136	506	126.5
	13	136	120	119	138	513	128.25
	14	123	134	139	120	516	129
	15	139	129	127	140	535	133.75
	16	134	138	124	128	524	131
	17	131	127	140	133	531	132.75
	18	129	121	136	130	516	129
	19	134	125	142	139	540	135
	20	123	119	138	135	515	128.75
	21	129	131	135	136	531	132.75
	22	143	142	144	145	574	143.5
	23	132	133	128	129	522	130.5
	24	139	138	131	143	551	137.75
	25	138	134	130	128	530	132.5
	26	132	132	139	135	538	134.5
	27	133	135	140	131	539	134.75
	28	140	127	133	132	532	133
	29	132	135	137	131	535	133.75
	30	128	135	134	126	523	130.75
	31	125	133	137	125	520	130
	32	140	128	130	138	536	134
	33	134	138	133	136	541	135.25
	34	136	138	123	123	520	130
	35	134	135	116	115	500	125
	36	131	130	139	139	539	134.75
	37	137	115	118	136	506	126.5
	38	136	120	119	138	513	128.25
	39	123	134	139	120	516	129
	40	139	129	127	140	535	133.75
	41	134	138	124	128	524	131
	42	131	127	140	133	531	132.75
	43	129	121	136	130	516	129
	44	134	125	142	139	540	135
	45	123	119	138	135	515	128.75
	46	129	131	135	136	531	132.75
	47	143	142	144	145	574	143.5
	48	132	133	128	129	522	130.5
	49	139	138	131	143	551	137.75
	50	138	134	130	128	530	132.5
	Total	6654	6565	6589	6608	26416
	Means	133.08	131.3	131.78	132.16	132.08
			BC1
	Plants	R1	R2	R3	R4	Total	means
	1	132	130	130	131	523	130.75
	2	132	129	133	132	526	131.5
	3	134	128	130	130	522	130.5
	4	133	127	132	130	522	130.5
	5	136	135	131	134	536	134
	6	135	134	137	134	540	135
	7	139	141	138	140	558	139.5
	8	129	132	127	127	515	128.75
	9	140	141	138	139	558	139.5
	10	131	130	129	130	520	130
	11	132	129	130	131	522	130.5
	12	133	136	131	132	532	133
	13	135	139	136	140	550	137.5
	14	130	126	133	128	517	129.25
	15	136	138	134	135	543	135.75
	16	130	133	130	130	523	130.75
	17	128	131	129	130	518	129.5
	18	139	144	138	141	562	140.5
	19	131	135	130	130	526	131.5
	20	137	141	138	142	558	139.5
	Total	2672	2679	2654	2666	10671
	Means	133.6	133.95	132.7	133.3	133.387
			BC2
	Plants	R1	R2	R3	R4	Total	means
	1	134	130	133	129	526	131.5
	2	125	129	126	130	510	127.5
	3	141	137	140	136	554	138.5
	4	129	133	134	134	530	132.5
	5	129	125	128	124	506	126.5
	6	125	134	125	130	514	128.5
	7	125	133	126	132	516	129
	8	127	131	128	132	518	129.5
	9	133	129	132	128	522	130.5
	10	129	130	129	129	517	129.25
	11	129	125	128	124	506	126.5
	12	134	130	133	129	526	131.5
	13	136	132	135	131	534	133.5
	14	130	126	129	125	510	127.5
	15	133	129	132	128	522	130.5
	16	123	127	124	128	502	125.5
	17	128	124	127	123	502	125.5
	18	135	139	136	140	550	137.5
	19	124	120	123	119	486	121.5
	20	130	134	131	135	530	132.5
	Total	2599	2597	2599	2586	10381
	Means	129.95	129.85	129.95	129.3	129.762
		Plant height
		Cross I
		P1
	Plants	R1	R2	R3	R4	Total	means
	1	81	78	78	79	316	79
	2	74	75	74	75	298	74.5
	3	75	75	75	74	299	74.75
	4	79	80	83	82	324	81
	5	77	81	79	80	317	79.25
	6	72	74	75	73	294	73.5
	7	75	72	75	74	296	74
	8	80	79	80	79	318	79.5
	9	80	82	80	81	323	80.75
	10	81	78	83	82	324	81
	11	79	79	83	82	323	80.75
	12	77	77	80	78	312	78
	13	82	79	78	80	319	79.75
	14	77	71	71	76	295	73.75
	15	78	75	74	76	303	75.75
	16	74	72	74	72	292	73
	17	78	80	81	79	318	79.5
	18	77	76	76	75	304	76
	19	79	81	77	80	317	79.25
	20	79	83	80	80	322	80.5
	Total	1554	1547	1556	1557	6214
	Means	77.7	77.35	77.8	77.85	77.675
			P2
	Plants	R1	R2	R3	R4	Total	means
	1	75	75	74	76	300	75
	2	78	79	80	79	316	79
	3	77	76	75	76	304	76
	4	75	78	79	77	309	77.25
	5	75	78	75	79	307	76.75
	6	77	75	76	78	306	76.5
	7	77	76	78	79	310	77.5
	8	75	77	76	76	304	76
	9	75	73	75	76	299	74.75
	10	78	78	79	79	314	78.5
	11	78	78	76	77	309	77.25
	12	79	77	78	78	312	78
	13	77	75	75	77	304	76
	14	75	75	73	74	297	74.25
	15	75	72	74	73	294	73.5
	16	76	74	75	75	300	75
	17	73	74	73	75	295	73.75
	18	71	74	71	72	288	72
	19	71	72	71	72	286	71.5
	20	72	75	73	74	294	73.5
	Total	1509	1511	1506	1522	6048
	Means	75.45	75.55	75.3	76.1	75.6
			F1
	Plants	R1	R2	R3	R4	Total	means
	1	84	85	83	84	336	84
	2	84	84	83	84	335	83.75
	3	84	84	81	82	331	82.75
	4	76	78	78	77	309	77.25
	5	80	76	79	78	313	78.25
	6	77	81	80	79	317	79.25
	7	81	78	77	78	314	78.5
	8	80	79	80	79	318	79.5
	9	80	76	79	77	312	78
	10	80	80	82	80	322	80.5
	11	78	80	75	78	311	77.75
	12	79	80	82	80	321	80.25
	13	82	83	84	84	333	83.25
	14	78	80	81	78	317	79.25
	15	82	85	84	83	334	83.5
	16	76	78	83	80	317	79.25
	17	83	80	80	81	324	81
	18	80	78	77	79	314	78.5
	19	80	80	79	79	318	79.5
	20	79	80	78	78	315	78.75
	Total	1603	1605	1605	1598	6411
	Means	80.15	80.25	80.25	79.9	80.1375
			F2
	Plants	R1	R2	R3	R4	Total	means
	1	85	70	73	82	310	77.5
	2	78	65	68	77	288	72
	3	88	87	75	75	325	81.25
	4	83	70	77	78	308	77
	5	89	73	75	85	322	80.5
	6	90	74	79	73	316	79
	7	63	75	70	68	276	69
	8	90	86	84	94	354	88.5
	9	80	95	89	93	357	89.25
	10	79	95	87	80	341	85.25
	11	90	85	80	72	327	81.75
	12	82	92	95	78	347	86.75
	13	85	92	93	83	353	88.25
	14	86	85	80	93	344	86
	15	80	83	95	93	351	87.75
	16	94	90	82	85	351	87.75
	17	80	76	87	70	313	78.25
	18	68	60	78	75	281	70.25
	19	64	63	79	79	285	71.25
	20	74	82	80	77	313	78.25
	21	69	70	80	81	300	75
	22	78	81	70	69	298	74.5
	23	63	80	74	75	292	73
	24	74	75	68	70	287	71.75
	25	68	69	75	78	290	72.5
	26	69	68	74	73	284	71
	27	83	80	77	75	315	78.75
	28	84	71	73	80	308	77
	29	83	82	72	71	308	77
	30	72	83	74	84	313	78.25
	31	90	74	79	73	316	79
	32	63	75	70	68	276	69
	33	90	86	84	94	354	88.5
	34	80	95	89	93	357	89.25
	35	79	95	87	80	341	85.25
	36	90	85	80	72	327	81.75
	37	82	92	95	78	347	86.75
	38	85	92	93	83	353	88.25
	39	86	85	80	93	344	86
	40	80	83	95	93	351	87.75
	41	94	90	82	85	351	87.75
	42	80	76	87	70	313	78.25
	43	68	60	78	75	281	70.25
	44	64	63	79	79	285	71.25
	45	74	82	80	77	313	78.25
	46	69	70	80	81	300	75
	47	78	81	70	69	298	74.5
	48	63	80	74	75	292	73
	49	74	75	68	70	287	71.75
	50	68	69	75	78	290	72.5
	Total	3928	3965	3988	3952	15833
	Means	78.56	79.3	79.76	79.04	79.165
			BC1
	Plants	R1	R2	R3	R4	Total	means
	1	79	75	78	74	306	76.5
	2	74	78	75	79	306	76.5
	3	85	81	84	80	330	82.5
	4	67	71	68	72	278	69.5
	5	75	71	74	70	290	72.5
	6	70	74	71	75	290	72.5
	7	75	71	74	70	290	72.5
	8	74	78	75	79	306	76.5
	9	77	73	76	72	298	74.5
	10	70	74	71	75	290	72.5
	11	77	73	76	72	298	74.5
	12	69	73	70	74	286	71.5
	13	76	72	75	71	294	73.5
	14	65	69	68	70	272	68
	15	79	75	78	74	306	76.5
	16	72	76	73	77	298	74.5
	17	85	82	84	80	331	82.75
	18	80	84	82	86	332	83
	19	84	80	82	78	324	81
	20	90	94	92	96	372	93
	Total	1523	1524	1526	1524	6097
	Means	76.15	76.2	76.3	76.2	76.2125
			BC2
	Plants	R1	R2	R3	R4	Total	means
	1	74	72	71	70	287	71.75
	2	73	70	70	71	284	71
	3	71	74	74	73	292	73
	4	73	75	72	74	294	73.5
	5	65	80	68	69	282	70.5
	6	70	65	68	70	273	68.25
	7	74	72	73	73	292	73
	8	74	73	73	74	294	73.5
	9	75	71	75	72	293	73.25
	10	73	70	71	72	286	71.5
	11	76	74	74	75	299	74.75
	12	72	75	72	73	292	73
	13	73	69	75	70	287	71.75
	14	71	72	76	73	292	73
	15	70	72	70	71	283	70.75
	16	75	73	76	75	299	74.75
	17	74	74	73	72	293	73.25
	18	72	70	70	71	283	70.75
	19	74	74	75	75	298	74.5
	20	74	75	75	74	298	74.5
	Total	1453	1450	1451	1447	5801
	Means	72.65	72.5	72.55	72.35	72.5125
			Plant height
			Cross II
			P1
	Plants	R1	R2	R3	R4	Total	means
	1	86	88	87	87	348	87
	2	90	83	88	89	350	87.5
	3	82	87	83	84	336	84
	4	82	87	83	86	338	84.5
	5	84	89	83	81	337	84.25
	6	87	83	81	85	336	84
	7	85	87	86	86	344	86
	8	87	89	88	87	351	87.75
	9	89	86	87	89	351	87.75
	10	90	85	87	89	351	87.75
	11	87	85	85	86	343	85.75
	12	83	81	79	82	325	81.25
	13	86	88	84	85	343	85.75
	14	86	88	90	89	353	88.25
	15	88	84	86	87	345	86.25
	16	84	87	89	86	346	86.5
	17	87	88	87	89	351	87.75
	18	83	85	87	84	339	84.75
	19	86	83	84	85	338	84.5
	20	86	88	90	89	353	88.25
	Total	1718	1721	1714	1725	6878
	Means	85.9	86.05	85.7	86.25	85.975
			P2
	Plants	R1	R2	R3	R4	Total	means
	1	78	78	78	79	313	78.25
	2	83	80	83	81	327	81.75
	3	79	79	84	78	320	80
	4	83	78	77	81	319	79.75
	5	69	74	83	74	300	75
	6	74	78	79	77	308	77
	7	79	77	80	79	315	78.75
	8	80	76	83	81	320	80
	9	78	80	78	79	315	78.75
	10	81	78	82	79	320	80
	11	79	79	83	80	321	80.25
	12	82	80	82	81	325	81.25
	13	77	79	80	79	315	78.75
	14	83	78	79	80	320	80
	15	77	77	80	79	313	78.25
	16	79	80	81	80	320	80
	17	78	82	80	79	319	79.75
	18	78	80	77	79	314	78.5
	19	82	79	79	78	318	79.5
	20	83	81	82	81	327	81.75
	Total	1582	1573	1610	1584	6349
	Means	79.1	78.65	80.5	79.2	79.3625
			F1
	Plants	R1	R2	R3	R4	Total	means
	1	88	86	83	85	342	85.5
	2	87	78	83	85	333	83.25
	3	88	87	81	85	341	85.25
	4	82	80	73	78	313	78.25
	5	68	68	68	70	274	68.5
	6	83	80	82	84	329	82.25
	7	80	83	75	78	316	79
	8	78	73	70	77	298	74.5
	9	79	78	73	81	311	77.75
	10	68	68	72	67	275	68.75
	11	80	68	75	68	291	72.75
	12	76	78	73	77	304	76
	13	81	70	74	74	299	74.75
	14	75	73	72	71	291	72.75
	15	73	74	78	73	298	74.5
	16	72	68	84	77	301	75.25
	17	68	68	74	72	282	70.5
	18	68	77	75	68	288	72
	19	67	80	77	72	296	74
	20	74	83	70	69	296	74
	Total	1535	1520	1512	1511	6078
	Means	76.75	76	75.6	75.55	75.975
			F2
	Plants	R1	R2	R3	R4	Total	means
	1	78	70	67	82	297	74.25
	2	63	66	73	79	281	70.25
	3	88	77	73	91	329	82.25
	4	91	78	83	90	342	85.5
	5	94	83	73	93	343	85.75
	6	80	98	103	77	358	89.5
	7	99	73	79	92	343	85.75
	8	91	100	75	86	352	88
	9	80	97	98	72	347	86.75
	10	87	73	76	83	319	79.75
	11	72	96	89	83	340	85
	12	92	78	73	92	335	83.75
	13	73	83	90	68	314	78.5
	14	70	85	91	67	313	78.25
	15	89	75	78	88	330	82.5
	16	84	86	98	95	363	90.75
	17	88	80	76	89	333	83.25
	18	93	87	73	67	320	80
	19	66	74	89	83	312	78
	20	93	88	81	73	335	83.75
	21	73	78	90	92	333	83.25
	22	80	89	68	67	304	76
	23	75	73	90	93	331	82.75
	24	93	76	78	87	334	83.5
	25	93	78	80	88	339	84.75
	26	71	86	89	73	319	79.75
	27	70	90	83	68	311	77.75
	28	93	80	73	95	341	85.25
	29	73	61	88	80	302	75.5
	30	73	87	93	77	330	82.5
	31	80	98	103	77	358	89.5
	32	99	73	79	92	343	85.75
	33	91	100	75	86	352	88
	34	80	97	98	72	347	86.75
	35	87	73	76	83	319	79.75
	36	72	96	89	83	340	85
	37	92	78	73	92	335	83.75
	38	73	83	90	68	314	78.5
	39	70	85	91	67	313	78.25
	40	89	75	78	88	330	82.5
	41	84	86	98	95	363	90.75
	42	88	80	76	89	333	83.25
	43	93	87	73	67	320	80
	44	66	74	89	83	312	78
	45	93	88	81	73	335	83.75
	46	73	78	90	92	333	83.25
	47	80	89	68	67	304	76
	48	75	73	90	93	331	82.75
	49	93	76	78	87	334	83.5
	50	93	78	80	88	339	84.75
	Total	4136	4112	4145	4112	16505
	Means	82.72	82.24	82.9	82.24	82.525
			BC1
	Plants	R1	R2	R3	R4	Total	means
	1	74	70	73	69	286	71.5
	2	69	73	70	74	286	71.5
	3	84	80	83	79	326	81.5
	4	84	88	85	89	346	86.5
	5	89	85	88	84	346	86.5
	6	53	57	54	58	222	55.5
	7	84	80	83	79	326	81.5
	8	85	89	86	90	350	87.5
	9	99	95	98	94	386	96.5
	10	99	103	100	104	406	101.5
	11	74	70	73	69	286	71.5
	12	82	86	83	87	338	84.5
	13	70	66	69	65	270	67.5
	14	94	98	95	99	386	96.5
	15	83	79	82	78	322	80.5
	16	88	92	89	93	362	90.5
	17	84	80	83	79	326	81.5
	18	81	85	82	86	334	83.5
	19	74	70	73	69	286	71.5
	20	55	59	56	60	230	57.5
	Total	1605	1605	1605	1605	6420
	Means	80.25	80.25	80.25	80.25	80.25
			BC2
	Plants	R1	R2	R3	R4	Total	means
	1	79	75	78	74	306	76.5
	2	80	84	81	85	330	82.5
	3	76	72	75	71	294	73.5
	4	65	69	66	70	270	67.5
	5	75	71	74	70	290	72.5
	6	65	69	66	70	270	67.5
	7	74	70	73	69	286	71.5
	8	88	92	89	93	362	90.5
	9	70	66	69	65	270	67.5
	10	55	59	56	60	230	57.5
	11	82	78	81	79	320	80
	12	85	89	86	90	350	87.5
	13	80	76	79	75	310	77.5
	14	70	74	71	75	290	72.5
	15	77	73	76	72	298	74.5
	16	72	76	73	77	298	74.5
	17	94	92	95	91	372	93
	18	90	94	91	95	370	92.5
	19	90	86	89	85	350	87.5
	20	71	75	72	76	294	73.5
	Total	1538	1540	1540	1542	6160
	Means	76.9	77	77	77.1	77
			Panicle length
			Cross I
			P1
	Plants	R1	R2	R3	R4	Total	means
	1	20	20	20	20	80	20
	2	20	20	20	20	80	20
	3	21	21	20	20	82	20.5
	4	20	20	20	21	81	20.25
	5	20	21	20	21	82	20.5
	6	22	20	21	21	84	21
	7	20	20	20	21	81	20.25
	8	22	21	20	20	83	20.75
	9	21	20	21	20	82	20.5
	10	21	21	20	20	82	20.5
	11	20	21	20	21	82	20.5
	12	20	20	21	21	82	20.5
	13	21	21	21	20	83	20.75
	14	20	20	20	21	81	20.25
	15	21	21	22	21	85	21.25
	16	20	20	21	21	82	20.5
	17	22	22	22	22	88	22
	18	21	21	20	20	82	20.5
	19	22	22	22	22	88	22
	20	21	21	21	21	84	21
	Total	415	413	412	414	1654
	Means	20.75	20.65	20.6	20.7	20.675
			P2
	Plants	R1	R2	R3	R4	Total	means
	1	18	17	17	18	70	17.5
	2	17	18	18	17	70	17.5
	3	18	17	17	18	70	17.5
	4	18	17	17	18	70	17.5
	5	19	18	19	18	74	18.5
	6	18	17	18	17	70	17.5
	7	18	18	17	17	70	17.5
	8	18	17	17	18	70	17.5
	9	18	18	18	17	71	17.75
	10	17	17	18	18	70	17.5
	11	16	17	17	16	66	16.5
	12	17	17	16	16	66	16.5
	13	17	17	17	17	68	17
	14	18	18	17	17	70	17.5
	15	19	19	18	18	74	18.5
	16	18	18	18	19	73	18.25
	17	18	17	18	17	70	17.5
	18	18	17	18	17	70	17.5
	19	18	19	19	18	74	18.5
	20	17	17	18	17	69	17.25
	Total	355	350	352	348	1405
	Means	17.75	17.5	17.6	17.4	17.5625
			F1
	Plants	R1	R2	R3	R4	Total	means
	1	22	21	22	21	86	21.5
	2	22	22	23	23	90	22.5
	3	23	22	23	22	90	22.5
	4	22	23	22	23	90	22.5
	5	22	22	23	23	90	22.5
	6	22	22	22	22	88	22
	7	23	23	23	23	92	23
	8	23	23	22	22	90	22.5
	9	22	23	22	23	90	22.5
	10	22	22	23	23	90	22.5
	11	23	22	22	23	90	22.5
	12	22	21	22	21	86	21.5
	13	22	22	22	22	88	22
	14	23	22	23	22	90	22.5
	15	22	21	22	21	86	21.5
	16	22	22	22	22	88	22
	17	23	23	23	23	92	23
	18	22	22	22	21	87	21.75
	19	22	22	22	22	88	22
	20	22	22	22	22	88	22
	Total	446	442	447	444	1779
	Means	22.3	22.1	22.35	22.2	22.2375
			F2
	Plants	R1	R2	R3	R4	Total	means
	1	21	22	19	20	82	20.5
	2	22	19	20	21	82	20.5
	3	18	21	21	23	83	20.75
	4	21	20	23	22	86	21.5
	5	23	22	20	20	85	21.25
	6	20	23	22	20	85	21.25
	7	21	20	23	22	86	21.5
	8	22	21	20	19	82	20.5
	9	20	20	23	22	85	21.25
	10	23	23	19	20	85	21.25
	11	19	22	23	18	82	20.5
	12	23	23	20	20	86	21.5
	13	20	23	22	21	86	21.5
	14	21	19	19	22	81	20.25
	15	22	20	21	23	86	21.5
	16	19	20	22	22	83	20.75
	17	22	22	19	20	83	20.75
	18	19	20	23	23	85	21.25
	19	19	19	21	22	81	20.25
	20	22	23	18	17	80	20
	21	23	20	20	23	86	21.5
	22	23	20	20	22	85	21.25
	23	21	18	22	23	84	21
	24	21	22	17	21	81	20.25
	25	19	17	22	22	80	20
	26	19	19	23	22	83	20.75
	27	20	18	22	23	83	20.75
	28	23	23	20	17	83	20.75
	29	18	19	21	21	79	19.75
	30	19	21	21	17	78	19.5
	31	20	23	22	20	85	21.25
	32	21	20	23	22	86	21.5
	33	22	21	20	19	82	20.5
	34	20	20	23	22	85	21.25
	35	23	23	19	20	85	21.25
	36	19	22	23	18	82	20.5
	37	23	23	20	20	86	21.5
	38	20	23	22	21	86	21.5
	39	21	19	19	22	81	20.25
	40	22	20	21	23	86	21.5
	41	19	20	22	22	83	20.75
	42	22	22	19	20	83	20.75
	43	19	20	23	23	85	21.25
	44	19	19	21	22	81	20.25
	45	22	23	18	17	80	20
	46	23	20	20	23	86	21.5
	47	23	20	20	22	85	21.25
	48	21	18	22	23	84	21
	49	21	22	17	21	81	20.25
	50	19	17	22	22	80	20
	Total	1042	1034	1042	1050	4168
	Means	20.84	20.68	20.84	21	20.84
			BC1
	Plants	R1	R2	R3	R4	Total	means
	1	24	24	24	24	96	24
	2	23	23	22	24	92	23
	3	22	21	23	20	86	21.5
	4	24	24	23	25	96	24
	5	22	20	22	20	84	21
	6	18	20	19	19	76	19
	7	22	22	21	21	86	21.5
	8	23	23	23	23	92	23
	9	25	25	25	25	100	25
	10	20	20	20	20	80	20
	11	16	18	18	18	70	17.5
	12	18	18	18	18	72	18
	13	22	22	22	22	88	22
	14	23	23	23	23	92	23
	15	23	23	23	23	92	23
	16	22	22	22	22	88	22
	17	25	25	25	25	100	25
	18	18	18	18	18	72	18
	19	22	22	22	22	88	22
	20	25	25	25	25	100	25
	Total	437	438	438	437	1750
	Means	21.85	21.9	21.9	21.85	21.875
			BC2
	Plants	R1	R2	R3	R4	Total	means
	1	24	24	23	25	96	24
	2	23	21	22	21	87	21.75
	3	19	23	22	21	85	21.25
	4	21	21	21	21	84	21
	5	20	20	20	20	80	20
	6	20	19	21	22	82	20.5
	7	18	18	18	18	72	18
	8	20	21	22	20	83	20.75
	9	19	19	19	19	76	19
	10	18	22	20	19	79	19.75
	11	21	21	21	21	84	21
	12	18	19	18	18	73	18.25
	13	21	19	21	20	81	20.25
	14	20	20	20	20	80	20
	15	21	21	21	21	84	21
	16	17	17	17	17	68	17
	17	20	20	20	20	80	20
	18	20	22	19	22	83	20.75
	19	18	17	18	17	70	17.5
	20	19	19	19	19	76	19
	Total	397	403	402	401	1603
	Means	19.85	20.15	20.1	20.05	20.0375
			Panicle length
			Cross II
			P1
	Plants	R1	R2	R3	R4	Total	means
	1	21	21	22	22	86	21.5
	2	20	20	20	20	80	20
	3	21	21	20	20	82	20.5
	4	20	20	20	21	81	20.25
	5	22	21	22	21	86	21.5
	6	22	22	22	22	88	22
	7	20	20	20	21	81	20.25
	8	22	21	20	20	83	20.75
	9	21	20	21	20	82	20.5
	10	21	21	20	20	82	20.5
	11	20	21	20	21	82	20.5
	12	22	22	22	22	88	22
	13	21	22	21	22	86	21.5
	14	21	21	21	22	85	21.25
	15	21	22	22	22	87	21.75
	16	22	22	21	22	87	21.75
	17	22	22	22	22	88	22
	18	21	21	20	20	82	20.5
	19	22	22	22	22	88	22
	20	21	21	21	21	84	21
	Total	423	423	419	423	1688
	Means	21.15	21.15	20.95	21.15	21.1
			P2
	Plants	R1	R2	R3	R4	Total	means
	1	22	22	22	22	88	22
	2	21	21	22	22	86	21.5
	3	20	22	21	21	84	21
	4	22	22	22	21	87	21.75
	5	22	21	22	21	86	21.5
	6	21	22	21	22	86	21.5
	7	22	20	21	21	84	21
	8	22	21	22	21	86	21.5
	9	21	21	21	21	84	21
	10	22	20	21	22	85	21.25
	11	22	22	22	21	87	21.75
	12	21	22	22	21	86	21.5
	13	21	20	21	20	82	20.5
	14	22	21	22	22	87	21.75
	15	22	22	22	22	88	22
	16	21	22	22	21	86	21.5
	17	22	22	21	22	87	21.75
	18	21	21	20	21	83	20.75
	19	20	20	21	21	82	20.5
	20	20	21	20	21	82	20.5
	Total	427	425	428	426	1706
	Means	21.35	21.25	21.4	21.3	21.325
			F1
	Plants	R1	R2	R3	R4	Total	means
	1	22	22	21	21	86	21.5
	2	23	22	23	23	91	22.75
	3	22	22	23	22	89	22.25
	4	23	23	22	23	91	22.75
	5	23	22	23	23	91	22.75
	6	22	22	21	21	86	21.5
	7	23	22	23	23	91	22.75
	8	23	22	22	22	89	22.25
	9	22	22	22	23	89	22.25
	10	21	21	22	22	86	21.5
	11	22	23	22	22	89	22.25
	12	22	22	21	21	86	21.5
	13	21	23	22	22	88	22
	14	22	23	23	22	90	22.5
	15	23	22	22	22	89	22.25
	16	23	22	22	22	89	22.25
	17	22	22	23	23	90	22.5
	18	22	21	23	21	87	21.75
	19	22	22	22	22	88	22
	20	21	21	21	22	85	21.25
	Total	444	441	443	442	1770
	Means	22.2	22.05	22.15	22.1	22.125
			F2
	Plants	R1	R2	R3	R4	Total	means
	1	21	23	23	21	88	22
	2	21	24	24	20	89	22.25
	3	23	23	22	23	91	22.75
	4	23	21	22	23	89	22.25
	5	24	20	24	19	87	21.75
	6	24	18	19	24	85	21.25
	7	18	19	23	22	82	20.5
	8	21	19	18	22	80	20
	9	23	20	21	23	87	21.75
	10	20	22	19	22	83	20.75
	11	21	21	23	22	87	21.75
	12	22	19	24	21	86	21.5
	13	23	20	23	20	86	21.5
	14	23	19	20	21	83	20.75
	15	17	23	22	20	82	20.5
	16	18	23	23	20	84	21
	17	23	22	18	19	82	20.5
	18	21	23	20	19	83	20.75
	19	20	20	23	23	86	21.5
	20	22	20	21	22	85	21.25
	21	20	22	23	20	85	21.25
	22	20	23	22	20	85	21.25
	23	23	19	19	22	83	20.75
	24	20	20	21	22	83	20.75
	25	21	22	20	20	83	20.75
	26	18	19	21	21	79	19.75
	27	21	19	18	20	78	19.5
	28	18	17	21	21	77	19.25
	29	21	20	18	18	77	19.25
	30	21	18	17	20	76	19
	31	24	18	19	24	85	21.25
	32	18	19	23	22	82	20.5
	33	21	19	18	22	80	20
	34	23	20	21	23	87	21.75
	35	20	22	19	22	83	20.75
	36	21	21	23	22	87	21.75
	37	22	19	24	21	86	21.5
	38	23	20	23	20	86	21.5
	39	23	19	20	21	83	20.75
	40	17	23	22	20	82	20.5
	41	18	23	23	20	84	21
	42	23	22	18	19	82	20.5
	43	21	23	20	19	83	20.75
	44	20	20	23	23	86	21.5
	45	22	20	21	22	85	21.25
	46	20	22	23	20	85	21.25
	47	20	23	22	20	85	21.25
	48	23	19	19	22	83	20.75
	49	20	20	21	22	83	20.75
	50	21	22	20	20	83	20.75
	Total	1051	1032	1054	1054	4191
	Means	21.02	20.64	21.08	21.08	20.955
			BC1
	Plants	R1	R2	R3	R4	Total	means
	1	24	24	24	24	96	24
	2	19	18	19	18	74	18.5
	3	20	20	20	20	80	20
	4	24	24	24	24	96	24
	5	22	22	22	22	88	22
	6	21	21	21	21	84	21
	7	22	22	21	21	86	21.5
	8	20	20	20	20	80	20
	9	18	18	18	18	72	18
	10	22	22	22	22	88	22
	11	17	17	17	17	68	17
	12	21	21	21	21	84	21
	13	22	22	22	22	88	22
	14	21	21	21	21	84	21
	15	22	22	22	22	88	22
	16	21	21	21	21	84	21
	17	19	19	19	19	76	19
	18	21	21	21	21	84	21
	19	19	19	19	19	76	19
	20	24	24	24	24	96	24
	Total	419	418	418	417	1672
	Means	20.95	20.9	20.9	20.85	20.9
			BC2
	Plants	R1	R2	R3	R4	Total	means
	1	24	24	24	24	96	24
	2	22	23	22	23	90	22.5
	3	23	23	22	22	90	22.5
	4	24	23	23	24	94	23.5
	5	22	22	22	22	88	22
	6	20	20	20	20	80	20
	7	22	22	22	22	88	22
	8	22	22	22	22	88	22
	9	23	23	23	23	92	23
	10	20	20	20	20	80	20
	11	21	21	21	21	84	21
	12	20	20	20	21	81	20.25
	13	23	23	23	23	92	23
	14	22	22	22	22	88	22
	15	21	21	21	21	84	21
	16	23	23	24	23	93	23.25
	17	22	22	22	22	88	22
	18	22	22	22	22	88	22
	19	20	20	20	20	80	20
	20	20	20	20	20	80	20
	Total	436	436	435	437	1744
	Means	21.8	21.8	21.75	21.85	21.8
		Number of panicles/ plant
		Cross I
		P1
	Plants	R1	R2	R3	R4	Total	means
	1	15	14	15	13	57	14.25
	2	13	11	10	12	46	11.5
	3	11	10	13	11	45	11.25
	4	14	18	18	15	65	16.25
	5	13	16	14	15	58	14.5
	6	18	11	12	17	58	14.5
	7	16	14	10	14	54	13.5
	8	17	15	15	17	64	16
	9	15	16	16	15	62	15.5
	10	15	17	18	16	66	16.5
	11	14	18	13	15	60	15
	12	16	19	18	17	70	17.5
	13	17	17	17	17	68	17
	14	19	18	19	18	74	18.5
	15	15	14	16	15	60	15
	16	16	13	14	15	58	14.5
	17	14	15	14	15	58	14.5
	18	15	16	18	17	66	16.5
	19	14	17	15	16	62	15.5
	20	12	15	15	13	55	13.75
	Total	299	304	300	303	1206
	Means	14.95	15.2	15	15.15	15.075
			P2
	Plants	R1	R2	R3	R4	Total	means
	1	9	8	7	8	32	8
	2	11	9	9	10	39	9.75
	3	7	5	5	6	23	5.75
	4	9	9	10	10	38	9.5
	5	11	12	10	11	44	11
	6	5	8	6	7	26	6.5
	7	6	7	7	6	26	6.5
	8	6	7	8	7	28	7
	9	8	8	7	7	30	7.5
	10	11	12	9	10	42	10.5
	11	10	11	11	10	42	10.5
	12	12	11	10	11	44	11
	13	8	6	6	7	27	6.75
	14	6	8	8	6	28	7
	15	6	7	7	8	28	7
	16	9	7	7	8	31	7.75
	17	8	6	9	7	30	7.5
	18	10	8	9	9	36	9
	19	9	8	8	10	35	8.75
	20	11	9	12	10	42	10.5
	Total	172	166	165	168	671
	Means	8.6	8.3	8.25	8.4	8.3875
			F1
	Plants	R1	R2	R3	R4	Total	means
	1	18	17	18	20	73	18.25
	2	13	12	15	13	53	13.25
	3	17	20	19	18	74	18.5
	4	19	16	15	17	67	16.75
	5	20	20	18	19	77	19.25
	6	20	17	18	19	74	18.5
	7	17	14	15	14	60	15
	8	17	20	19	18	74	18.5
	9	21	20	16	17	74	18.5
	10	20	20	21	21	82	20.5
	11	18	19	17	18	72	18
	12	21	19	23	20	83	20.75
	13	15	17	20	16	68	17
	14	19	20	18	19	76	19
	15	20	19	20	18	77	19.25
	16	18	20	19	20	77	19.25
	17	19	19	21	20	79	19.75
	18	16	18	18	17	69	17.25
	19	16	16	16	16	64	16
	20	18	18	20	19	75	18.75
	Total	362	361	366	359	1448
	Means	18.1	18.05	18.3	17.95	18.1
			F2
	Plants	R1	R2	R3	R4	Total	means
	1	21	14	15	20	70	17.5
	2	13	14	21	21	69	17.25
	3	20	14	14	19	67	16.75
	4	21	19	13	12	65	16.25
	5	12	12	20	20	64	16
	6	18	19	11	12	60	15
	7	18	16	13	12	59	14.75
	8	9	20	18	11	58	14.5
	9	18	20	9	10	57	14.25
	10	19	10	9	18	56	14
	11	11	10	18	17	56	14
	12	9	18	17	10	54	13.5
	13	11	9	18	16	54	13.5
	14	16	18	8	11	53	13.25
	15	9	10	18	16	53	13.25
	16	16	15	11	10	52	13
	17	16	9	8	19	52	13
	18	16	10	10	14	50	12.5
	19	18	8	9	15	50	12.5
	20	15	16	9	10	50	12.5
	21	10	15	16	8	49	12.25
	22	17	6	9	16	48	12
	23	9	7	17	15	48	12
	24	8	15	18	7	48	12
	25	10	14	15	8	47	11.75
	26	8	12	17	9	46	11.5
	27	7	8	14	16	45	11.25
	28	12	9	8	14	43	10.75
	29	14	12	8	9	43	10.75
	30	7	7	12	15	41	10.25
	31	18	19	11	12	60	15
	32	18	16	13	12	59	14.75
	33	9	20	18	11	58	14.5
	34	18	20	9	10	57	14.25
	35	19	10	9	18	56	14
	36	11	10	18	17	56	14
	37	9	18	17	10	54	13.5
	38	11	9	18	16	54	13.5
	39	16	18	8	11	53	13.25
	40	9	10	18	16	53	13.25
	41	16	15	11	10	52	13
	42	16	9	8	19	52	13
	43	16	10	10	14	50	12.5
	44	18	8	9	15	50	12.5
	45	15	16	9	10	50	12.5
	46	10	15	16	8	49	12.25
	47	17	6	9	16	48	12
	48	9	7	17	15	48	12
	49	8	15	18	7	48	12
	50	10	14	15	8	47	11.75
	Total	681	651	664	665	2661
	Means	13.62	13.02	13.28	13.3	13.305
			BC1
	Plants	R1	R2	R3	R4	Total	means
	1	14	16	15	15	60	15
	2	13	11	14	12	50	12.5
	3	24	21	23	22	90	22.5
	4	20	17	20	19	76	19
	5	8	12	7	11	38	9.5
	6	11	13	10	12	46	11.5
	7	13	15	12	14	54	13.5
	8	15	14	16	13	58	14.5
	9	13	14	12	15	54	13.5
	10	10	11	9	12	42	10.5
	11	11	10	10	12	43	10.75
	12	17	14	16	15	62	15.5
	13	9	11	10	12	42	10.5
	14	15	14	13	16	58	14.5
	15	20	20	20	20	80	20
	16	12	13	11	12	48	12
	17	14	12	15	13	54	13.5
	18	11	11	11	11	44	11
	19	12	14	14	13	53	13.25
	20	13	13	13	13	52	13
	Total	275	276	271	282	1104
	Means	13.75	13.8	13.55	14.1	13.8
			BC2
	Plants	R1	R2	R3	R4	Total	means
	1	13	12	12	13	50	12.5
	2	9	9	8	10	36	9
	3	11	7	10	8	36	9
	4	10	11	9	10	40	10
	5	9	9	10	8	36	9
	6	15	15	16	14	60	15
	7	10	14	11	15	50	12.5
	8	9	12	10	13	44	11
	9	10	13	11	12	46	11.5
	10	13	11	14	12	50	12.5
	11	12	7	13	8	40	10
	12	12	10	13	11	46	11.5
	13	9	10	8	9	36	9
	14	9	6	8	7	30	7.5
	15	12	16	10	14	52	13
	16	9	13	10	12	44	11
	17	14	11	15	10	50	12.5
	18	9	9	10	8	36	9
	19	11	8	10	9	38	9.5
	20	10	10	11	9	40	10
	Total	216	213	219	212	860
	Means	10.8	10.65	10.95	10.6	10.75
		Number of panicles/ plant
		Cross II
		P1
	Plants	R1	R2	R3	R4	Total	means
	1	10	10	9	9	38	9.5
	2	19	17	18	17	71	17.75
	3	13	15	12	14	54	13.5
	4	12	13	15	14	54	13.5
	5	7	6	9	8	30	7.5
	6	12	8	8	10	38	9.5
	7	10	13	12	11	46	11.5
	8	13	15	10	12	50	12.5
	9	8	9	8	9	34	8.5
	10	11	12	11	10	44	11
	11	10	11	11	10	42	10.5
	12	16	11	14	13	54	13.5
	13	8	9	6	7	30	7.5
	14	7	8	9	6	30	7.5
	15	8	7	8	8	31	7.75
	16	9	10	11	8	38	9.5
	17	8	7	9	10	34	8.5
	18	10	8	9	9	36	9
	19	9	8	8	9	34	8.5
	20	11	10	12	10	43	10.75
	Total	211	207	209	204	831
	Means	10.55	10.35	10.45	10.2	10.3875
			P2
	Plants	R1	R2	R3	R4	Total	means
	1	16	18	17	17	68	17
	2	19	20	20	18	77	19.25
	3	16	17	17	16	66	16.5
	4	14	10	15	13	52	13
	5	15	12	16	15	58	14.5
	6	13	15	13	14	55	13.75
	7	17	16	16	17	66	16.5
	8	18	16	17	17	68	17
	9	16	17	14	15	62	15.5
	10	16	17	14	16	63	15.75
	11	19	18	16	15	68	17
	12	16	19	18	17	70	17.5
	13	17	17	17	17	68	17
	14	19	18	19	18	74	18.5
	15	16	14	14	15	59	14.75
	16	17	14	17	15	63	15.75
	17	15	15	14	15	59	14.75
	18	16	16	18	18	68	17
	19	15	17	15	16	63	15.75
	20	14	15	15	16	60	15
	Total	324	321	322	320	1287
	Means	16.2	16.05	16.1	16	16.0875
			F1
	Plants	R1	R2	R3	R4	Total	means
	1	18	19	20	19	76	19
	2	15	14	16	14	59	14.75
	3	15	17	20	18	70	17.5
	4	15	17	19	17	68	17
	5	20	21	20	19	80	20
	6	23	22	21	20	86	21.5
	7	24	19	17	14	74	18.5
	8	19	19	20	20	78	19.5
	9	21	22	20	21	84	21
	10	23	25	22	24	94	23.5
	11	18	16	15	17	66	16.5
	12	19	19	19	20	77	19.25
	13	17	18	20	19	74	18.5
	14	23	20	18	19	80	20
	15	20	19	20	18	77	19.25
	16	18	20	19	20	77	19.25
	17	19	19	21	20	79	19.75
	18	19	18	18	17	72	18
	19	21	22	20	22	85	21.25
	20	18	18	18	19	73	18.25
	Total	385	384	383	377	1529
	Means	19.25	19.2	19.15	18.85	19.1125
			F2
	Plants	R1	R2	R3	R4	Total	means
	1	27	15	18	25	85	21.25
	2	24	19	19	23	85	21.25
	3	20	20	21	21	82	20.5
	4	24	20	19	15	78	19.5
	5	17	20	22	17	76	19
	6	14	22	21	16	73	18.25
	7	12	10	26	24	72	18
	8	22	16	14	20	72	18
	9	20	22	14	16	72	18
	10	13	22	21	15	71	17.75
	11	23	13	11	24	71	17.75
	12	21	20	14	14	69	17.25
	13	23	11	18	16	68	17
	14	9	12	20	24	65	16.25
	15	11	19	20	14	64	16
	16	19	22	11	12	64	16
	17	17	20	10	15	62	15.5
	18	18	19	13	11	61	15.25
	19	13	12	16	19	60	15
	20	16	18	13	12	59	14.75
	21	12	11	19	17	59	14.75
	22	13	11	16	18	58	14.5
	23	10	18	16	13	57	14.25
	24	11	16	15	12	54	13.5
	25	12	15	18	9	54	13.5
	26	14	12	9	17	52	13
	27	13	14	12	11	50	12.5
	28	8	15	16	9	48	12
	29	14	13	9	10	46	11.5
	30	13	9	7	15	44	11
	31	14	22	21	16	73	18.25
	32	12	10	26	24	72	18
	33	22	16	14	20	72	18
	34	20	22	14	16	72	18
	35	13	22	21	15	71	17.75
	36	23	13	11	24	71	17.75
	37	21	20	14	14	69	17.25
	38	23	11	18	16	68	17
	39	9	12	20	24	65	16.25
	40	11	19	20	14	64	16
	41	19	22	11	12	64	16
	42	17	20	10	15	62	15.5
	43	18	19	13	11	61	15.25
	44	13	12	16	19	60	15
	45	16	18	13	12	59	14.75
	46	12	11	19	17	59	14.75
	47	13	11	16	18	58	14.5
	48	10	18	16	13	57	14.25
	49	11	16	15	12	54	13.5
	50	12	15	18	9	54	13.5
	Total	792	815	804	805	3216
	Means	15.84	16.3	16.08	16.1	16.08
			BC1
	Plants	R1	R2	R3	R4	Total	means
	1	15	14	15	13	57	14.25
	2	9	10	8	10	37	9.25
	3	12	14	13	13	52	13
	4	16	19	17	18	70	17.5
	5	23	24	22	25	94	23.5
	6	12	9	12	10	43	10.75
	7	15	13	14	12	54	13.5
	8	20	18	19	17	74	18.5
	9	9	8	8	9	34	8.5
	10	12	11	13	12	48	12
	11	11	13	12	13	49	12.25
	12	12	12	12	13	49	12.25
	13	15	14	16	14	59	14.75
	14	10	8	10	8	36	9
	15	12	14	13	14	53	13.25
	16	16	18	17	19	70	17.5
	17	10	11	11	10	42	10.5
	18	12	13	14	12	51	12.75
	19	11	10	11	10	42	10.5
	20	10	9	10	9	38	9.5
	Total	262	262	267	261	1052
	Means	13.1	13.1	13.35	13.05	13.15
			BC2
	Plants	R1	R2	R3	R4	Total	means
	1	15	15	17	16	63	15.75
	2	27	28	29	28	112	28
	3	19	20	19	20	78	19.5
	4	11	9	12	10	42	10.5
	5	15	13	15	14	57	14.25
	6	14	12	12	13	51	12.75
	7	18	19	18	19	74	18.5
	8	12	11	10	13	46	11.5
	9	11	12	10	12	45	11.25
	10	19	18	17	17	71	17.75
	11	13	14	13	12	52	13
	12	19	19	20	20	78	19.5
	13	24	23	22	23	92	23
	14	15	17	18	17	67	16.75
	15	21	22	21	22	86	21.5
	16	12	13	12	13	50	12.5
	17	15	16	15	14	60	15
	18	24	26	25	26	101	25.25
	19	13	14	14	13	54	13.5
	20	13	12	13	12	50	12.5
	Total	330	333	332	334	1329
	Means	16.5	16.65	16.6	16.7	16.6125
		No. of filled grains/panicles
		Cross I
		P1
	Plants	R1	R2	R3	R4	Total	means
	1	150	145	150	147	592	148
	2	133	135	120	125	513	128.25
	3	120	110	100	115	445	111.25
	4	135	120	115	130	500	125
	5	135	125	127	133	520	130
	6	140	124	130	130	524	131
	7	125	133	142	140	540	135
	8	115	120	125	119	479	119.75
	9	128	133	140	130	531	132.75
	10	130	128	135	131	524	131
	11	119	115	116	114	464	116
	12	125	134	132	129	520	130
	13	140	144	142	138	564	141
	14	130	130	128	131	519	129.75
	15	135	133	141	137	546	136.5
	16	153	155	148	145	601	150.25
	17	144	148	132	135	559	139.75
	18	129	140	137	134	540	135
	19	138	140	147	148	573	143.25
	20	122	120	133	131	506	126.5
	Total	2646	2632	2640	2642	10560
	Means	132.3	131.6	132	132.1	132
			P2
	Plants	R1	R2	R3	R4	Total	means
	1	85	82	86	84	337	84.25
	2	90	84	90	85	349	87.25
	3	95	84	80	90	349	87.25
	4	93	85	85	90	353	88.25
	5	85	79	83	82	329	82.25
	6	94	93	85	89	361	90.25
	7	94	90	88	92	364	91
	8	97	98	97	95	387	96.75
	9	86	88	84	87	345	86.25
	10	89	95	95	93	372	93
	11	79	82	80	81	322	80.5
	12	80	84	85	83	332	83
	13	87	89	90	88	354	88.5
	14	88	88	92	90	358	89.5
	15	85	85	89	87	346	86.5
	16	99	97	95	98	389	97.25
	17	88	89	85	86	348	87
	18	98	97	99	99	393	98.25
	19	89	90	93	92	364	91
	20	90	88	87	89	354	88.5
	Total	1791	1767	1768	1780	7106
	Means	89.55	88.35	88.4	89	88.825
			F1
	Plants	R1	R2	R3	R4	Total	means
	1	77	67	72	68	284	71
	2	90	94	96	99	379	94.75
	3	75	66	72	72	285	71.25
	4	65	69	73	67	274	68.5
	5	85	77	72	80	314	78.5
	6	99	100	97	93	389	97.25
	7	77	70	80	73	300	75
	8	90	98	89	99	376	94
	9	70	74	84	77	305	76.25
	10	100	103	106	105	414	103.5
	11	75	74	77	75	301	75.25
	12	78	80	81	79	318	79.5
	13	73	83	80	75	311	77.75
	14	77	85	78	80	320	80
	15	79	74	80	75	308	77
	16	78	80	73	74	305	76.25
	17	74	83	70	80	307	76.75
	18	82	81	71	79	313	78.25
	19	83	87	77	85	332	83
	20	80	85	87	84	336	84
	Total	1607	1630	1615	1619	6471
	Means	80.35	81.5	80.75	80.95	80.8875
			F2
	Plants	R1	R2	R3	R4	Total	means
	1	94	70	82	100	346	86.5
	2	66	104	77	80	327	81.75
	3	80	76	80	85	321	80.25
	4	76	78	85	80	319	79.75
	5	90	102	55	62	309	77.25
	6	52	62	88	100	302	75.5
	7	90	88	63	52	293	73.25
	8	50	88	106	44	288	72
	9	74	74	71	66	285	71.25
	10	80	60	53	90	283	70.75
	11	66	75	68	70	279	69.75
	12	70	73	67	63	273	68.25
	13	95	42	46	80	263	65.75
	14	58	68	57	65	248	62
	15	65	58	65	55	243	60.75
	16	56	55	50	80	241	60.25
	17	71	63	43	53	230	57.5
	18	40	45	90	50	225	56.25
	19	57	53	60	50	220	55
	20	45	55	49	70	219	54.75
	21	50	49	58	60	217	54.25
	22	52	61	47	55	215	53.75
	23	49	52	52	50	203	50.75
	24	44	40	55	60	199	49.75
	25	50	48	44	55	197	49.25
	26	57	55	44	40	196	49
	27	52	46	56	40	194	48.5
	28	46	52	56	40	194	48.5
	29	47	42	52	49	190	47.5
	30	52	43	45	50	190	47.5
	31	52	62	88	100	302	75.5
	32	90	88	63	52	293	73.25
	33	50	88	106	44	288	72
	34	74	74	71	66	285	71.25
	35	80	60	53	90	283	70.75
	36	66	75	68	70	279	69.75
	37	70	73	67	63	273	68.25
	38	95	42	46	80	263	65.75
	39	58	68	57	65	248	62
	40	65	58	65	55	243	60.75
	41	56	55	50	80	241	60.25
	42	71	63	43	53	230	57.5
	43	40	45	90	50	225	56.25
	44	57	53	60	50	220	55
	45	45	55	49	70	219	54.75
	46	50	49	58	60	217	54.25
	47	52	61	47	55	215	53.75
	48	49	52	52	50	203	50.75
	49	44	40	55	60	199	49.75
	50	50	48	44	55	197	49.25
	Total	3088	3086	3096	3162	12432
	Means	61.76	61.72	61.92	63.24	62.16
			BC1
	Plants	R1	R2	R3	R4	Total	means
	1	78	74	77	73	302	75.5
	2	73	77	74	78	302	75.5
	3	64	60	63	59	246	61.5
	4	60	64	61	65	250	62.5
	5	85	81	84	80	330	82.5
	6	71	75	72	76	294	73.5
	7	65	61	64	60	250	62.5
	8	60	64	61	65	250	62.5
	9	68	64	67	63	262	65.5
	10	64	68	65	69	266	66.5
	11	68	64	67	63	262	65.5
	12	67	71	68	72	278	69.5
	13	79	75	78	74	306	76.5
	14	78	82	79	83	322	80.5
	15	80	76	79	75	310	77.5
	16	71	75	72	76	294	73.5
	17	75	71	74	70	290	72.5
	18	80	84	81	85	330	82.5
	19	87	83	86	82	338	84.5
	20	81	84	82	84	331	82.75
	Total	1454	1453	1454	1452	5813
	Means	72.7	72.65	72.7	72.6	72.6625
			BC2
	Plants	R1	R2	R3	R4	Total	means
	1	106	110	107	111	434	108.5
	2	105	101	104	100	410	102.5
	3	104	100	103	99	406	101.5
	4	95	99	96	100	390	97.5
	5	93	97	94	98	382	95.5
	6	100	104	101	105	410	102.5
	7	88	92	89	93	362	90.5
	8	89	93	91	94	367	91.75
	9	95	91	94	90	370	92.5
	10	103	99	102	98	402	100.5
	11	104	100	103	99	406	101.5
	12	117	121	118	122	478	119.5
	13	123	119	122	118	482	120.5
	14	135	131	134	130	530	132.5
	119	119	115	118	114	466	116.5
	16	122	118	121	117	478	119.5
	17	129	133	130	134	526	131.5
	18	130	134	131	135	530	132.5
	19	109	105	108	104	426	106.5
	20	99	103	100	104	406	101.5
	Total	2165	2165	2166	2165	8661
	Means	108.25	108.25	108.3	108.25	108.263
		No. of filled grains/panicles
		Cross II
		P1
	Plants	R1	R2	R3	R4	Total	means
	1	108	115	123	112	458	114.5
	2	110	114	118	108	450	112.5
	3	103	100	110	105	418	104.5
	4	111	110	114	115	450	112.5
	5	115	112	112	113	452	113
	6	107	116	119	114	456	114
	7	98	94	99	100	391	97.75
	8	95	97	97	95	384	96
	9	97	98	100	95	390	97.5
	10	99	95	93	97	384	96
	11	100	104	101	102	407	101.75
	12	102	106	103	105	416	104
	13	105	108	104	106	423	105.75
	14	108	110	105	107	430	107.5
	15	110	107	105	109	431	107.75
	16	115	114	110	112	451	112.75
	17	113	112	115	110	450	112.5
	18	120	121	117	119	477	119.25
	19	110	109	105	108	432	108
	20	115	110	113	111	449	112.25
	Total	2141	2152	2163	2143	8599
	Means	107.05	107.6	108.15	107.15	107.487
			P2
	Plants	R1	R2	R3	R4	Total	means
	1	117	120	120	116	473	118.25
	2	120	118	125	125	488	122
	3	127	125	119	118	489	122.25
	4	130	132	128	130	520	130
	5	133	130	133	133	529	132.25
	6	125	129	122	130	506	126.5
	7	112	112	116	110	450	112.5
	8	113	115	115	114	457	114.25
	9	115	119	118	116	468	117
	10	118	118	117	117	470	117.5
	11	118	122	119	120	479	119.75
	12	120	116	115	123	474	118.5
	13	125	129	125	130	509	127.25
	14	124	128	124	131	507	126.75
	15	123	126	126	127	502	125.5
	16	128	133	130	130	521	130.25
	17	130	130	134	135	529	132.25
	18	132	134	132	134	532	133
	19	130	130	131	126	517	129.25
	20	122	125	119	119	485	121.25
	Total	2462	2491	2468	2484	9905
	Means	123.1	124.55	123.4	124.2	123.812
			F1
	Plants	R1	R2	R3	R4	Total	means
	1	120	132	127	115	494	123.5
	2	130	120	125	119	494	123.5
	3	99	103	103	102	407	101.75
	4	145	137	125	130	537	134.25
	5	150	140	145	144	579	144.75
	6	120	113	117	119	469	117.25
	7	155	150	155	150	610	152.5
	8	144	140	144	140	568	142
	9	120	123	125	130	498	124.5
	10	100	98	100	99	397	99.25
	11	105	100	110	100	415	103.75
	12	117	120	119	122	478	119.5
	13	122	125	113	130	490	122.5
	14	133	130	135	128	526	131.5
	15	150	155	152	154	611	152.75
	16	119	120	115	117	471	117.75
	17	129	135	130	131	525	131.25
	18	135	130	130	130	525	131.25
	19	100	106	107	104	417	104.25
	20	130	133	130	133	526	131.5
	Total	2523	2510	2507	2497	10037
	Means	126.15	125.5	125.35	124.85	125.463
			F2
	Plants	R1	R2	R3	R4	Total	means
	1	140	133	150	155	578	144.5
	2	150	155	133	130	568	142
	3	126	117	120	125	488	122
	4	116	110	124	120	470	117.5
	5	112	112	120	123	467	116.75
	6	112	105	123	117	457	114.25
	7	105	123	118	103	449	112.25
	8	119	100	110	115	444	111
	9	105	103	119	117	444	111
	10	120	105	100	116	441	110.25
	11	100	116	118	105	439	109.75
	12	100	100	120	118	438	109.5
	13	106	90	120	114	430	107.5
	14	109	114	99	104	426	106.5
	15	94	120	114	97	425	106.25
	16	95	100	109	117	421	105.25
	17	98	110	118	94	420	105
	18	110	112	95	100	417	104.25
	19	115	95	95	110	415	103.75
	20	109	99	100	107	415	103.75
	21	93	116	109	97	415	103.75
	22	110	112	90	93	405	101.25
	23	105	110	98	90	403	100.75
	24	97	103	107	95	402	100.5
	25	110	105	93	93	401	100.25
	26	110	105	93	93	401	100.25
	27	107	90	93	105	395	98.75
	28	101	105	96	92	394	98.5
	29	90	107	100	94	391	97.75
	30	110	88	92	100	390	97.5
	31	112	105	123	117	457	114.25
	32	105	123	118	103	449	112.25
	33	119	100	110	115	444	111
	34	105	103	119	117	444	111
	35	120	105	100	116	441	110.25
	36	100	116	118	105	439	109.75
	37	100	100	120	118	438	109.5
	38	106	90	120	114	430	107.5
	39	109	114	99	104	426	106.5
	40	94	120	114	97	425	106.25
	41	95	100	109	117	421	105.25
	42	98	110	118	94	420	105
	43	110	112	95	100	417	104.25
	44	115	95	95	110	415	103.75
	45	109	99	100	107	415	103.75
	46	93	116	109	97	415	103.75
	47	110	112	90	93	405	101.25
	48	105	110	98	90	403	100.75
	49	97	103	107	95	402	100.5
	50	110	105	93	93	401	100.25
	Total	5386	5398	5431	5341	21556
	Means	107.72	107.96	108.62	106.82	107.78
			BC1
	Plants	R1	R2	R3	R4	Total	means
	1	114	110	113	109	446	111.5
	2	110	114	111	115	450	112.5
	3	100	96	99	95	390	97.5
	4	108	112	109	113	442	110.5
	5	100	104	101	105	410	102.5
	6	102	106	103	107	418	104.5
	7	93	89	92	88	362	90.5
	8	89	93	90	94	366	91.5
	9	120	116	119	115	470	117.5
	10	98	102	99	103	402	100.5
	11	105	101	104	100	410	102.5
	12	117	121	118	122	478	119.5
	13	105	101	104	100	410	102.5
	14	107	103	106	102	418	104.5
	15	115	111	114	110	450	112.5
	16	85	89	86	90	350	87.5
	17	88	84	87	83	342	85.5
	18	86	90	87	91	354	88.5
	19	109	105	108	104	426	106.5
	20	99	104	100	105	408	102
	Total	2050	2051	2050	2051	8202
	Means	102.5	102.55	102.5	102.55	102.525
			BC2
	Plants	R1	R2	R3	R4	Total	means
	1	120	116	119	115	470	117.5
	2	124	120	123	119	486	121.5
	3	140	144	141	145	570	142.5
	4	130	126	129	125	510	127.5
	5	149	145	128	144	566	141.5
	6	124	120	123	119	486	121.5
	7	130	134	131	135	530	132.5
	8	112	116	113	117	458	114.5
	9	120	124	121	125	490	122.5
	10	98	102	99	103	402	100.5
	11	100	104	101	105	410	102.5
	12	117	121	118	122	478	119.5
	13	102	106	103	107	418	104.5
	14	110	114	111	115	450	112.5
	15	133	137	134	138	542	135.5
	16	122	118	121	117	478	119.5
	17	129	133	130	134	526	131.5
	18	107	103	106	102	418	104.5
	19	100	106	107	104	417	104.25
	20	104	100	103	99	406	101.5
	Total	2371	2389	2361	2390	9511
	Means	118.55	119.45	118.05	119.5	118.888
		1000- Grain weight
		Cross I
		P1
	Plants	R1	R2	R3	R4	Total	means
	1	19.6	18.5	19.6	18.5	76.2	19.05
	2	17.5	17.5	18.5	18.5	72	18
	3	19.6	18.5	19.6	18.5	76.2	19.05
	4	18.5	19.6	18.5	18.5	75.1	18.775
	5	18.5	18.5	19.6	19.6	76.2	19.05
	6	17.5	18.5	17.5	18.5	72	18
	7	19.6	18.5	18.5	19.6	76.2	19.05
	8	18.5	19.6	18.5	18.5	75.1	18.775
	9	19.6	19.6	18.5	18.5	76.2	19.05
	10	18.5	18.5	19.6	19.6	76.2	19.05
	11	19.6	19.6	18.5	18.5	76.2	19.05
	12	18.5	18.5	18.5	18.5	74	18.5
	13	18.5	18.5	18.5	19.6	75.1	18.775
	14	18.5	18.5	18.5	18.5	74	18.5
	15	18.5	18.5	19.6	19.6	76.2	19.05
	16	19.6	18.5	18.5	19.6	76.2	19.05
	17	19.6	18.5	18.5	19.6	76.2	19.05
	18	17.5	18.5	18.5	17.5	72	18
	19	19.6	18.5	18.5	19.6	76.2	19.05
	20	19.6	19.6	18.5	18.5	76.2	19.05
	Total	376.9	374.5	374.5	377.8	1503.7
	Means	18.845	18.725	18.725	18.89	18.7963
			P2
	Plants	R1	R2	R3	R4	Total	means
	1	24.5	25.5	24.5	25.5	100	25
	2	25.5	25.5	24.5	24.5	100	25
	3	24.5	24.5	24.5	25.5	99	24.75
	4	25.5	25.5	25.5	25.5	102	25.5
	5	26.5	26.5	25.5	25.5	104	26
	6	25.5	25.5	26.5	26.5	104	26
	7	25.5	26.5	26.5	25.5	104	26
	8	24.5	24.5	25.5	25.5	100	25
	9	25.5	26.5	26.5	25.5	104	26
	10	26.5	25.5	25.5	26.5	104	26
	11	24.5	25.5	25.5	24.5	100	25
	12	25.5	24.5	24.5	25.5	100	25
	13	26.5	25.5	26.5	25.5	104	26
	14	26.5	26.5	25.5	25.5	104	26
	15	25.5	25.5	24.5	24.5	100	25
	16	25.5	24.5	25.5	26.5	102	25.5
	17	25.5	25.5	26.5	26.5	104	26
	18	26.5	25.5	25.5	26.5	104	26
	19	25.5	25.5	26.5	25.5	103	25.75
	20	26.5	26.5	25.5	25.5	104	26
	Total	512	511	511	512	2046
	Means	25.6	25.55	25.55	25.6	25.575
			F1
	Plants	R1	R2	R3	R4	Total	means
	1	25.25	24.24	25.25	24.24	98.98	24.745
	2	25.25	26.26	25.25	26.26	103.02	25.755
	3	24.24	25.25	24.24	25.25	98.98	24.745
	4	26.26	25.25	26.26	25.25	103.02	25.755
	5	25.25	26.26	25.25	26.26	103.02	25.755
	6	24.24	24.24	25.25	24.24	97.97	24.4925
	7	26.26	25.25	26.26	25.25	103.02	25.755
	8	25.25	26.26	25.25	26.26	103.02	25.755
	9	26.26	25.25	26.26	25.25	103.02	25.755
	10	26.26	26.26	26.26	26.26	105.04	26.26
	11	24.24	25.25	24.24	25.25	98.98	24.745
	12	25.25	24.24	25.25	24.24	98.98	24.745
	13	25.25	26.26	26.26	26.26	104.03	26.0075
	14	24.24	24.24	25.25	24.24	97.97	24.4925
	15	25.25	25.25	25.25	25.25	101	25.25
	16	24.24	26.26	26.26	26.26	103.02	25.755
	17	26.26	26.26	25.25	26.26	104.03	26.0075
	18	26.26	25.25	26.26	25.25	103.02	25.755
	19	26.26	26.26	25.25	26.26	104.03	26.0075
	20	25.25	26.26	24.24	26.26	102.01	25.5025
	Total	507.02	510.05	509.04	510.05	2036.16
	Means	25.351	25.5025	25.452	25.5025	25.452
			F2
	Plants	R1	R2	R3	R4	Total	means
	1	25.3	24.2	23.2	22.2	94.9	23.725
	2	22.2	24.2	22.2	25.3	93.9	23.475
	3	22.2	24.2	25.3	21.2	92.9	23.225
	4	21.2	25.3	24.2	20.2	90.9	22.725
	5	21.2	20.2	25.3	24.2	90.9	22.725
	6	24.2	21.2	20.2	25.3	90.9	22.725
	7	20.2	20.2	25.3	25.3	91	22.75
	8	24.2	23.2	21.2	21.2	89.8	22.45
	9	20.2	23.2	24.2	21.2	88.8	22.2
	10	24.2	21.2	20.2	23.2	88.8	22.2
	11	21.2	24.2	23.2	20.2	88.8	22.2
	12	24.2	23.2	21.2	20.2	88.8	22.2
	13	20.2	19.2	23.2	25.3	87.9	21.975
	14	23.2	23.2	20.2	20.2	86.8	21.7
	15	23.2	20.2	20.2	23.2	86.8	21.7
	16	24.2	23.2	20.2	19.2	86.8	21.7
	17	22.2	20.2	21.2	23.2	86.8	21.7
	18	20.2	22.2	23.2	20.2	85.8	21.45
	19	23.2	20.2	19.2	23.2	85.8	21.45
	20	24.2	19.2	20.2	22.2	85.8	21.45
	21	20.2	23.2	23.2	18.2	84.8	21.2
	22	20.2	19.2	22.2	23.2	84.8	21.2
	23	23.2	19.2	19.2	23.2	84.8	21.2
	24	22.2	19.2	20.2	23.2	84.8	21.2
	25	20.2	21.2	22.2	20.2	83.8	20.95
	26	19.2	22.2	23.2	18.2	82.8	20.7
	27	22.2	19.2	19.2	21.2	81.8	20.45
	28	19.2	22.2	22.2	18.2	81.8	20.45
	29	19.2	22.2	22.2	18.2	81.8	20.45
	30	22.2	20.2	19.2	18.2	79.8	19.95
	31	24.2	21.2	20.2	25.3	90.9	22.725
	32	20.2	20.2	25.3	25.3	91	22.75
	33	24.2	23.2	21.2	21.2	89.8	22.45
	34	20.2	23.2	24.2	21.2	88.8	22.2
	35	24.2	21.2	20.2	23.2	88.8	22.2
	36	21.2	24.2	23.2	20.2	88.8	22.2
	37	24.2	23.2	21.2	20.2	88.8	22.2
	38	20.2	19.2	23.2	25.3	87.9	21.975
	39	23.2	23.2	20.2	20.2	86.8	21.7
	40	23.2	20.2	20.2	23.2	86.8	21.7
	41	24.2	23.2	20.2	19.2	86.8	21.7
	42	22.2	20.2	21.2	23.2	86.8	21.7
	43	20.2	22.2	23.2	20.2	85.8	21.45
	44	23.2	20.2	19.2	23.2	85.8	21.45
	45	24.2	19.2	20.2	22.2	85.8	21.45
	46	20.2	23.2	23.2	18.2	84.8	21.2
	47	20.2	19.2	22.2	23.2	84.8	21.2
	48	23.2	19.2	19.2	23.2	84.8	21.2
	49	22.2	19.2	20.2	23.2	84.8	21.2
	50	20.2	21.2	22.2	20.2	83.8	20.95
	Total	1104.1	1076.1	1086.4	1089.7	4356.3
	Means	22.082	21.522	21.728	21.794	21.7815
			BC1
	Plants	R1	R2	R3	R4	Total	means
	1	20.2	21.2	20.2	21.2	82.8	20.7
	2	20.2	19.2	19.2	19.2	77.8	19.45
	3	20.2	19.2	19.2	20.2	78.8	19.7
	4	22.2	20.2	21.2	22.2	85.8	21.45
	5	20.2	21.2	22.2	21.2	84.8	21.2
	6	21.2	20.2	21.2	22.2	84.8	21.2
	7	23.4	22.2	22.2	23.2	91	22.75
	8	23.2	21.2	22.2	23.2	89.8	22.45
	9	22.2	21.2	21.2	22.2	86.8	21.7
	10	23.2	22.2	22.2	23.2	90.8	22.7
	11	23.2	22.2	22.2	23.2	90.8	22.7
	12	19.2	19.2	19.2	19.2	76.8	19.2
	13	22.2	23.2	22.2	23.2	90.8	22.7
	14	20.2	20.2	20.2	20.2	80.8	20.2
	15	22.2	22.2	22.2	22.2	88.8	22.2
	16	20.2	22.2	20.2	20.2	82.8	20.7
	17	21.2	21.2	20.2	20.2	82.8	20.7
	18	21.2	21.2	21.2	21.2	84.8	21.2
	19	22.2	21.2	22.2	21.2	86.8	21.7
	20	23.2	22.2	23.2	22.2	90.8	22.7
	Total	431.2	423	424	431	1709.2
	Means	21.56	21.15	21.2	21.55	21.365
			BC2
	Plants	R1	R2	R3	R4	Total	means
	1	22.2	21.2	22.2	21.2	86.8	21.7
	2	25.3	24.2	25.3	24.2	99	24.75
	3	22.2	22.2	22.2	22.2	88.8	22.2
	4	21.2	22.2	23.2	23.2	89.8	22.45
	5	20.2	21.2	21.2	20.2	82.8	20.7
	6	24.2	25.3	25.3	24.2	99	24.75
	7	21.2	20.2	20.2	21.2	82.8	20.7
	8	22.2	23.2	24.2	25.3	94.9	23.725
	9	23.2	22.2	20.2	20.2	85.8	21.45
	10	25.3	24.2	25.3	24.2	99	24.75
	11	25.3	24.2	24.2	25.3	99	24.75
	12	25.3	24.2	24.2	25.3	99	24.75
	13	22.2	22.2	23.2	23.2	90.8	22.7
	14	23.2	23.2	22.2	22.2	90.8	22.7
	15	23.2	23.2	22.2	22.2	90.8	22.7
	16	25.3	24.2	25.3	24.2	99	24.75
	17	21.2	20.2	24.2	21.2	86.8	21.7
	18	24.2	21.2	24.2	22.2	91.8	22.95
	19	21.2	22.2	22.2	23.2	88.8	22.2
	20	22.2	23.2	23.2	22.2	90.8	22.7
	Total	460.5	454.1	464.4	457.3	1836.3
	Means	23.025	22.705	23.22	22.865	22.9537
		100- Grain weight
		Cross II
		P1
	Plants	R1	R2	R3	R4	Total	means
	1	25.25	26.26	26.26	22.22	99.99	24.9975
	2	25.25	25.25	26.26	25.25	102.01	25.5025
	3	26.26	26.26	26.26	26.26	105.04	26.26
	4	27.27	27.27	27.27	27.27	109.08	27.27
	5	25.25	25.25	25.25	25.25	101	25.25
	6	26.26	26.26	26.26	26.26	105.04	26.26
	7	27.27	26.26	25.25	26.26	105.04	26.26
	8	25.25	25.25	26.26	26.26	103.02	25.755
	9	26.26	26.26	25.25	25.25	103.02	25.755
	10	27.27	27.27	26.26	26.26	107.06	26.765
	11	25.25	26.26	26.26	25.25	103.02	25.755
	12	26.26	26.26	26.26	26.26	105.04	26.26
	13	27.27	27.27	27.27	27.27	109.08	27.27
	14	25.25	25.25	25.25	25.25	101	25.25
	15	26.26	26.26	26.26	26.26	105.04	26.26
	16	27.27	26.26	26.26	27.27	107.06	26.765
	17	25.25	25.25	26.26	25.25	102.01	25.5025
	18	26.26	26.26	26.26	26.26	105.04	26.26
	19	27.27	27.27	26.26	26.26	107.06	26.765
	20	26.26	25.25	26.26	25.25	103.02	25.755
	Total	524.19	523.18	523.18	517.12	2087.67
	Means	26.2095	26.159	26.159	25.856	26.0959
			P2
	Plants	R1	R2	R3	R4	Total	means
	1	18.18	19.19	18.18	19.19	74.74	18.685
	2	18.18	18.18	18.18	18.18	72.72	18.18
	3	18.18	19.19	19.19	18.18	74.74	18.685
	4	18.18	17.17	18.18	17.17	70.7	17.675
	5	19.19	18.18	18.18	19.19	74.74	18.685
	6	18.18	19.19	18.18	19.19	74.74	18.685
	7	17.17	17.17	18.18	18.18	70.7	17.675
	8	18.18	18.18	17.17	17.17	70.7	17.675
	9	19.19	19.19	19.19	19.19	76.76	19.19
	10	19.19	18.18	19.19	18.18	74.74	18.685
	11	18.18	18.18	19.19	19.19	74.74	18.685
	12	18.18	18.18	17.17	17.17	70.7	17.675
	13	18.18	18.18	18.18	18.18	72.72	18.18
	14	18.18	19.19	18.18	19.19	74.74	18.685
	15	19.19	18.18	19.19	18.18	74.74	18.685
	16	19.19	19.19	18.18	18.18	74.74	18.685
	17	19.19	18.18	19.19	18.18	74.74	18.685
	18	18.18	19.19	18.18	19.19	74.74	18.685
	19	17.17	18.18	17.17	18.18	70.7	17.675
	20	19.19	19.19	19.19	19.19	76.76	19.19
	Total	368.65	369.66	367.64	368.65	1474.6
	Means	18.4325	18.483	18.382	18.4325	18.4325
			F1
	Plants	R1	R2	R3	R4	Total	means
	1	22.22	23.23	20.2	23.23	88.88	22.22
	2	22.22	22.22	22.22	22.22	88.88	22.22
	3	23.23	22.22	22.22	23.23	90.9	22.725
	4	24.24	24.24	24.24	24.24	96.96	24.24
	5	23.23	23.23	22.22	22.22	90.9	22.725
	6	22.22	23.23	22.22	23.23	90.9	22.725
	7	23.23	23.23	23.23	23.23	92.92	23.23
	8	23.23	22.22	23.23	22.22	90.9	22.725
	9	23.23	22.22	23.23	22.22	90.9	22.725
	10	22.22	23.23	23.23	22.22	90.9	22.725
	11	24.24	23.23	24.24	23.23	94.94	23.735
[truncated: 2,225 more rows]
